# Supplementary material for: Resectability and Ablatability Criteria for the Treatment of Liver Only Colorectal Metastases: Multidisciplinary Consensus Document from the COLLISION Trial Group
Source: MDPI journal article supplement (doi:10.3390/cancers12071779), 2020-07-03
Supplement: s1 [file s1]

## Online appendix C: Statements plus outcomes

| <p>1. AGE: Curative-intent local therapy for CRLM is appropriate for all age groups at the prerequisite that the general health status is adequate (ECOG <math>\leq 2</math>, ASA <math>\leq 3</math> and CCI <math>\leq 8</math>); Treatment cannot be withheld based on patients' age alone</p>                                                                                                                                       | 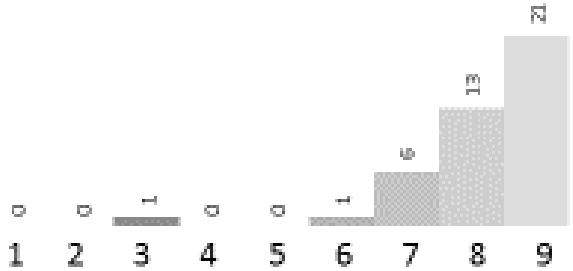 <table border="1"> <thead> <tr> <th>Age Group</th> <th>Count</th> </tr> </thead> <tbody> <tr><td>1</td><td>0</td></tr> <tr><td>2</td><td>0</td></tr> <tr><td>3</td><td>1</td></tr> <tr><td>4</td><td>0</td></tr> <tr><td>5</td><td>0</td></tr> <tr><td>6</td><td>1</td></tr> <tr><td>7</td><td>5</td></tr> <tr><td>8</td><td>13</td></tr> <tr><td>9</td><td>21</td></tr> </tbody> </table>                       | Age Group                      | Count | 1 | 0 | 2 | 0 | 3 | 1 | 4 | 0 | 5 | 0 | 6 | 1 | 7 | 5  | 8 | 13 | 9 | 21 |
|-----------------------------------------------------------------------------------------------------------------------------------------------------------------------------------------------------------------------------------------------------------------------------------------------------------------------------------------------------------------------------------------------------------------------------------------|-----------------------------------------------------------------------------------------------------------------------------------------------------------------------------------------------------------------------------------------------------------------------------------------------------------------------------------------------------------------------------------------------------------------------------------------------------------------------------------------------------|--------------------------------|-------|---|---|---|---|---|---|---|---|---|---|---|---|---|----|---|----|---|----|
| Age Group                                                                                                                                                                                                                                                                                                                                                                                                                               | Count                                                                                                                                                                                                                                                                                                                                                                                                                                                                                               |                                |       |   |   |   |   |   |   |   |   |   |   |   |   |   |    |   |    |   |    |
| 1                                                                                                                                                                                                                                                                                                                                                                                                                                       | 0                                                                                                                                                                                                                                                                                                                                                                                                                                                                                                   |                                |       |   |   |   |   |   |   |   |   |   |   |   |   |   |    |   |    |   |    |
| 2                                                                                                                                                                                                                                                                                                                                                                                                                                       | 0                                                                                                                                                                                                                                                                                                                                                                                                                                                                                                   |                                |       |   |   |   |   |   |   |   |   |   |   |   |   |   |    |   |    |   |    |
| 3                                                                                                                                                                                                                                                                                                                                                                                                                                       | 1                                                                                                                                                                                                                                                                                                                                                                                                                                                                                                   |                                |       |   |   |   |   |   |   |   |   |   |   |   |   |   |    |   |    |   |    |
| 4                                                                                                                                                                                                                                                                                                                                                                                                                                       | 0                                                                                                                                                                                                                                                                                                                                                                                                                                                                                                   |                                |       |   |   |   |   |   |   |   |   |   |   |   |   |   |    |   |    |   |    |
| 5                                                                                                                                                                                                                                                                                                                                                                                                                                       | 0                                                                                                                                                                                                                                                                                                                                                                                                                                                                                                   |                                |       |   |   |   |   |   |   |   |   |   |   |   |   |   |    |   |    |   |    |
| 6                                                                                                                                                                                                                                                                                                                                                                                                                                       | 1                                                                                                                                                                                                                                                                                                                                                                                                                                                                                                   |                                |       |   |   |   |   |   |   |   |   |   |   |   |   |   |    |   |    |   |    |
| 7                                                                                                                                                                                                                                                                                                                                                                                                                                       | 5                                                                                                                                                                                                                                                                                                                                                                                                                                                                                                   |                                |       |   |   |   |   |   |   |   |   |   |   |   |   |   |    |   |    |   |    |
| 8                                                                                                                                                                                                                                                                                                                                                                                                                                       | 13                                                                                                                                                                                                                                                                                                                                                                                                                                                                                                  |                                |       |   |   |   |   |   |   |   |   |   |   |   |   |   |    |   |    |   |    |
| 9                                                                                                                                                                                                                                                                                                                                                                                                                                       | 21                                                                                                                                                                                                                                                                                                                                                                                                                                                                                                  |                                |       |   |   |   |   |   |   |   |   |   |   |   |   |   |    |   |    |   |    |
| <p>2. EASTERN COOPERATIVE ONCOLOGY GROUP (ECOG) SCORE: Curative-intent local therapy for CRLM is appropriate for ECOG <math>\leq 2</math> patients, for ECOG <math>\geq 3</math> patients the risks of surgery, thermal ablation and IRE do not outweigh the benefits; in select patients with limited disease (<math>\leq 3</math> CRLM) SBRT can be considered for ECOG 3 patients with a life expectancy <math>&gt;1</math> year</p> |  <table border="1"> <thead> <tr> <th>ECOG Score</th> <th>Count</th> </tr> </thead> <tbody> <tr><td>1</td><td>0</td></tr> <tr><td>2</td><td>0</td></tr> <tr><td>3</td><td>0</td></tr> <tr><td>4</td><td>2</td></tr> <tr><td>5</td><td>0</td></tr> <tr><td>6</td><td>3</td></tr> <tr><td>7</td><td>11</td></tr> <tr><td>8</td><td>11</td></tr> <tr><td>9</td><td>5</td></tr> </tbody> </table>                      | ECOG Score                     | Count | 1 | 0 | 2 | 0 | 3 | 0 | 4 | 2 | 5 | 0 | 6 | 3 | 7 | 11 | 8 | 11 | 9 | 5  |
| ECOG Score                                                                                                                                                                                                                                                                                                                                                                                                                              | Count                                                                                                                                                                                                                                                                                                                                                                                                                                                                                               |                                |       |   |   |   |   |   |   |   |   |   |   |   |   |   |    |   |    |   |    |
| 1                                                                                                                                                                                                                                                                                                                                                                                                                                       | 0                                                                                                                                                                                                                                                                                                                                                                                                                                                                                                   |                                |       |   |   |   |   |   |   |   |   |   |   |   |   |   |    |   |    |   |    |
| 2                                                                                                                                                                                                                                                                                                                                                                                                                                       | 0                                                                                                                                                                                                                                                                                                                                                                                                                                                                                                   |                                |       |   |   |   |   |   |   |   |   |   |   |   |   |   |    |   |    |   |    |
| 3                                                                                                                                                                                                                                                                                                                                                                                                                                       | 0                                                                                                                                                                                                                                                                                                                                                                                                                                                                                                   |                                |       |   |   |   |   |   |   |   |   |   |   |   |   |   |    |   |    |   |    |
| 4                                                                                                                                                                                                                                                                                                                                                                                                                                       | 2                                                                                                                                                                                                                                                                                                                                                                                                                                                                                                   |                                |       |   |   |   |   |   |   |   |   |   |   |   |   |   |    |   |    |   |    |
| 5                                                                                                                                                                                                                                                                                                                                                                                                                                       | 0                                                                                                                                                                                                                                                                                                                                                                                                                                                                                                   |                                |       |   |   |   |   |   |   |   |   |   |   |   |   |   |    |   |    |   |    |
| 6                                                                                                                                                                                                                                                                                                                                                                                                                                       | 3                                                                                                                                                                                                                                                                                                                                                                                                                                                                                                   |                                |       |   |   |   |   |   |   |   |   |   |   |   |   |   |    |   |    |   |    |
| 7                                                                                                                                                                                                                                                                                                                                                                                                                                       | 11                                                                                                                                                                                                                                                                                                                                                                                                                                                                                                  |                                |       |   |   |   |   |   |   |   |   |   |   |   |   |   |    |   |    |   |    |
| 8                                                                                                                                                                                                                                                                                                                                                                                                                                       | 11                                                                                                                                                                                                                                                                                                                                                                                                                                                                                                  |                                |       |   |   |   |   |   |   |   |   |   |   |   |   |   |    |   |    |   |    |
| 9                                                                                                                                                                                                                                                                                                                                                                                                                                       | 5                                                                                                                                                                                                                                                                                                                                                                                                                                                                                                   |                                |       |   |   |   |   |   |   |   |   |   |   |   |   |   |    |   |    |   |    |
| <p>3. AMERICAN SOCIETY of ANESTHESIOLOGISTS (ASA) SCORE: Curative-intent local therapy for CRLM is appropriate for ASA <math>\leq 3</math> patients, for ASA 4 patients the risks of surgery, thermal ablation and IRE do not outweigh the benefits; in select patients with limited disease (<math>\leq 3</math> CRLM) SBRT can be considered for ASA 4 patients</p>                                                                   |  <table border="1"> <thead> <tr> <th>ASA Score</th> <th>Count</th> </tr> </thead> <tbody> <tr><td>1</td><td>0</td></tr> <tr><td>2</td><td>0</td></tr> <tr><td>3</td><td>1</td></tr> <tr><td>4</td><td>0</td></tr> <tr><td>5</td><td>0</td></tr> <tr><td>6</td><td>3</td></tr> <tr><td>7</td><td>11</td></tr> <tr><td>8</td><td>11</td></tr> <tr><td>9</td><td>5</td></tr> </tbody> </table>                     | ASA Score                      | Count | 1 | 0 | 2 | 0 | 3 | 1 | 4 | 0 | 5 | 0 | 6 | 3 | 7 | 11 | 8 | 11 | 9 | 5  |
| ASA Score                                                                                                                                                                                                                                                                                                                                                                                                                               | Count                                                                                                                                                                                                                                                                                                                                                                                                                                                                                               |                                |       |   |   |   |   |   |   |   |   |   |   |   |   |   |    |   |    |   |    |
| 1                                                                                                                                                                                                                                                                                                                                                                                                                                       | 0                                                                                                                                                                                                                                                                                                                                                                                                                                                                                                   |                                |       |   |   |   |   |   |   |   |   |   |   |   |   |   |    |   |    |   |    |
| 2                                                                                                                                                                                                                                                                                                                                                                                                                                       | 0                                                                                                                                                                                                                                                                                                                                                                                                                                                                                                   |                                |       |   |   |   |   |   |   |   |   |   |   |   |   |   |    |   |    |   |    |
| 3                                                                                                                                                                                                                                                                                                                                                                                                                                       | 1                                                                                                                                                                                                                                                                                                                                                                                                                                                                                                   |                                |       |   |   |   |   |   |   |   |   |   |   |   |   |   |    |   |    |   |    |
| 4                                                                                                                                                                                                                                                                                                                                                                                                                                       | 0                                                                                                                                                                                                                                                                                                                                                                                                                                                                                                   |                                |       |   |   |   |   |   |   |   |   |   |   |   |   |   |    |   |    |   |    |
| 5                                                                                                                                                                                                                                                                                                                                                                                                                                       | 0                                                                                                                                                                                                                                                                                                                                                                                                                                                                                                   |                                |       |   |   |   |   |   |   |   |   |   |   |   |   |   |    |   |    |   |    |
| 6                                                                                                                                                                                                                                                                                                                                                                                                                                       | 3                                                                                                                                                                                                                                                                                                                                                                                                                                                                                                   |                                |       |   |   |   |   |   |   |   |   |   |   |   |   |   |    |   |    |   |    |
| 7                                                                                                                                                                                                                                                                                                                                                                                                                                       | 11                                                                                                                                                                                                                                                                                                                                                                                                                                                                                                  |                                |       |   |   |   |   |   |   |   |   |   |   |   |   |   |    |   |    |   |    |
| 8                                                                                                                                                                                                                                                                                                                                                                                                                                       | 11                                                                                                                                                                                                                                                                                                                                                                                                                                                                                                  |                                |       |   |   |   |   |   |   |   |   |   |   |   |   |   |    |   |    |   |    |
| 9                                                                                                                                                                                                                                                                                                                                                                                                                                       | 5                                                                                                                                                                                                                                                                                                                                                                                                                                                                                                   |                                |       |   |   |   |   |   |   |   |   |   |   |   |   |   |    |   |    |   |    |
| <p>4. UNDERLYING LIVER DISEASE (ICD-10): Curative-intent local therapy for CRLM is appropriate for no or mild underlying liver disease; for severe underlying liver disease the risks do not outweigh the benefits.</p>                                                                                                                                                                                                                 |  <table border="1"> <thead> <tr> <th>Underlying Liver Disease Score</th> <th>Count</th> </tr> </thead> <tbody> <tr><td>1</td><td>0</td></tr> <tr><td>2</td><td>0</td></tr> <tr><td>3</td><td>1</td></tr> <tr><td>4</td><td>3</td></tr> <tr><td>5</td><td>2</td></tr> <tr><td>6</td><td>3</td></tr> <tr><td>7</td><td>5</td></tr> <tr><td>8</td><td>11</td></tr> <tr><td>9</td><td>5</td></tr> </tbody> </table> | Underlying Liver Disease Score | Count | 1 | 0 | 2 | 0 | 3 | 1 | 4 | 3 | 5 | 2 | 6 | 3 | 7 | 5  | 8 | 11 | 9 | 5  |
| Underlying Liver Disease Score                                                                                                                                                                                                                                                                                                                                                                                                          | Count                                                                                                                                                                                                                                                                                                                                                                                                                                                                                               |                                |       |   |   |   |   |   |   |   |   |   |   |   |   |   |    |   |    |   |    |
| 1                                                                                                                                                                                                                                                                                                                                                                                                                                       | 0                                                                                                                                                                                                                                                                                                                                                                                                                                                                                                   |                                |       |   |   |   |   |   |   |   |   |   |   |   |   |   |    |   |    |   |    |
| 2                                                                                                                                                                                                                                                                                                                                                                                                                                       | 0                                                                                                                                                                                                                                                                                                                                                                                                                                                                                                   |                                |       |   |   |   |   |   |   |   |   |   |   |   |   |   |    |   |    |   |    |
| 3                                                                                                                                                                                                                                                                                                                                                                                                                                       | 1                                                                                                                                                                                                                                                                                                                                                                                                                                                                                                   |                                |       |   |   |   |   |   |   |   |   |   |   |   |   |   |    |   |    |   |    |
| 4                                                                                                                                                                                                                                                                                                                                                                                                                                       | 3                                                                                                                                                                                                                                                                                                                                                                                                                                                                                                   |                                |       |   |   |   |   |   |   |   |   |   |   |   |   |   |    |   |    |   |    |
| 5                                                                                                                                                                                                                                                                                                                                                                                                                                       | 2                                                                                                                                                                                                                                                                                                                                                                                                                                                                                                   |                                |       |   |   |   |   |   |   |   |   |   |   |   |   |   |    |   |    |   |    |
| 6                                                                                                                                                                                                                                                                                                                                                                                                                                       | 3                                                                                                                                                                                                                                                                                                                                                                                                                                                                                                   |                                |       |   |   |   |   |   |   |   |   |   |   |   |   |   |    |   |    |   |    |
| 7                                                                                                                                                                                                                                                                                                                                                                                                                                       | 5                                                                                                                                                                                                                                                                                                                                                                                                                                                                                                   |                                |       |   |   |   |   |   |   |   |   |   |   |   |   |   |    |   |    |   |    |
| 8                                                                                                                                                                                                                                                                                                                                                                                                                                       | 11                                                                                                                                                                                                                                                                                                                                                                                                                                                                                                  |                                |       |   |   |   |   |   |   |   |   |   |   |   |   |   |    |   |    |   |    |
| 9                                                                                                                                                                                                                                                                                                                                                                                                                                       | 5                                                                                                                                                                                                                                                                                                                                                                                                                                                                                                   |                                |       |   |   |   |   |   |   |   |   |   |   |   |   |   |    |   |    |   |    |

| <p>5. CHARLSON COMORBIDITY INDEX (CCI): Curative-intent local therapy for CRLM is appropriate for patients with CCI <math>\leq 4</math> and for patients with CCI 5-8 if the procedure is considered non-complex (minor hepatectomy +/- ablations); for patients with a CCI <math>\geq 9</math> the risks of surgery, thermal ablation and IRE do not outweigh the benefits; in select patients with limited disease (<math>\leq 3</math> CRLM) SBRT can be considered if CCI is 9-10.</p>                                                                                  | 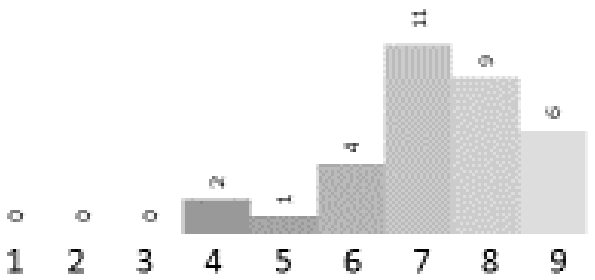 <table border="1"> <thead> <tr> <th>CCI Score</th> <th>Number of Patients</th> </tr> </thead> <tbody> <tr><td>1</td><td>0</td></tr> <tr><td>2</td><td>0</td></tr> <tr><td>3</td><td>0</td></tr> <tr><td>4</td><td>2</td></tr> <tr><td>5</td><td>1</td></tr> <tr><td>6</td><td>4</td></tr> <tr><td>7</td><td>11</td></tr> <tr><td>8</td><td>9</td></tr> <tr><td>9</td><td>6</td></tr> </tbody> </table>    | CCI Score | Number of Patients | 1 | 0 | 2 | 0 | 3 | 0 | 4 | 2 | 5 | 1 | 6 | 4 | 7 | 11 | 8 | 9  | 9 | 6  |
|-----------------------------------------------------------------------------------------------------------------------------------------------------------------------------------------------------------------------------------------------------------------------------------------------------------------------------------------------------------------------------------------------------------------------------------------------------------------------------------------------------------------------------------------------------------------------------|----------------------------------------------------------------------------------------------------------------------------------------------------------------------------------------------------------------------------------------------------------------------------------------------------------------------------------------------------------------------------------------------------------------------------------------------------------------------------------------------|-----------|--------------------|---|---|---|---|---|---|---|---|---|---|---|---|---|----|---|----|---|----|
| CCI Score                                                                                                                                                                                                                                                                                                                                                                                                                                                                                                                                                                   | Number of Patients                                                                                                                                                                                                                                                                                                                                                                                                                                                                           |           |                    |   |   |   |   |   |   |   |   |   |   |   |   |   |    |   |    |   |    |
| 1                                                                                                                                                                                                                                                                                                                                                                                                                                                                                                                                                                           | 0                                                                                                                                                                                                                                                                                                                                                                                                                                                                                            |           |                    |   |   |   |   |   |   |   |   |   |   |   |   |   |    |   |    |   |    |
| 2                                                                                                                                                                                                                                                                                                                                                                                                                                                                                                                                                                           | 0                                                                                                                                                                                                                                                                                                                                                                                                                                                                                            |           |                    |   |   |   |   |   |   |   |   |   |   |   |   |   |    |   |    |   |    |
| 3                                                                                                                                                                                                                                                                                                                                                                                                                                                                                                                                                                           | 0                                                                                                                                                                                                                                                                                                                                                                                                                                                                                            |           |                    |   |   |   |   |   |   |   |   |   |   |   |   |   |    |   |    |   |    |
| 4                                                                                                                                                                                                                                                                                                                                                                                                                                                                                                                                                                           | 2                                                                                                                                                                                                                                                                                                                                                                                                                                                                                            |           |                    |   |   |   |   |   |   |   |   |   |   |   |   |   |    |   |    |   |    |
| 5                                                                                                                                                                                                                                                                                                                                                                                                                                                                                                                                                                           | 1                                                                                                                                                                                                                                                                                                                                                                                                                                                                                            |           |                    |   |   |   |   |   |   |   |   |   |   |   |   |   |    |   |    |   |    |
| 6                                                                                                                                                                                                                                                                                                                                                                                                                                                                                                                                                                           | 4                                                                                                                                                                                                                                                                                                                                                                                                                                                                                            |           |                    |   |   |   |   |   |   |   |   |   |   |   |   |   |    |   |    |   |    |
| 7                                                                                                                                                                                                                                                                                                                                                                                                                                                                                                                                                                           | 11                                                                                                                                                                                                                                                                                                                                                                                                                                                                                           |           |                    |   |   |   |   |   |   |   |   |   |   |   |   |   |    |   |    |   |    |
| 8                                                                                                                                                                                                                                                                                                                                                                                                                                                                                                                                                                           | 9                                                                                                                                                                                                                                                                                                                                                                                                                                                                                            |           |                    |   |   |   |   |   |   |   |   |   |   |   |   |   |    |   |    |   |    |
| 9                                                                                                                                                                                                                                                                                                                                                                                                                                                                                                                                                                           | 6                                                                                                                                                                                                                                                                                                                                                                                                                                                                                            |           |                    |   |   |   |   |   |   |   |   |   |   |   |   |   |    |   |    |   |    |
| <p>6. STAGE IVa DISEASE: Upfront curative intent local treatment without peri-procedural systemic therapy is the appropriate therapy if the procedure is considered non-complex (minor hepatectomy and/or ablations).</p>                                                                                                                                                                                                                                                                                                                                                   |  <table border="1"> <thead> <tr> <th>CCI Score</th> <th>Number of Patients</th> </tr> </thead> <tbody> <tr><td>1</td><td>0</td></tr> <tr><td>2</td><td>0</td></tr> <tr><td>3</td><td>0</td></tr> <tr><td>4</td><td>0</td></tr> <tr><td>5</td><td>0</td></tr> <tr><td>6</td><td>2</td></tr> <tr><td>7</td><td>8</td></tr> <tr><td>8</td><td>16</td></tr> <tr><td>9</td><td>18</td></tr> </tbody> </table>   | CCI Score | Number of Patients | 1 | 0 | 2 | 0 | 3 | 0 | 4 | 0 | 5 | 0 | 6 | 2 | 7 | 8  | 8 | 16 | 9 | 18 |
| CCI Score                                                                                                                                                                                                                                                                                                                                                                                                                                                                                                                                                                   | Number of Patients                                                                                                                                                                                                                                                                                                                                                                                                                                                                           |           |                    |   |   |   |   |   |   |   |   |   |   |   |   |   |    |   |    |   |    |
| 1                                                                                                                                                                                                                                                                                                                                                                                                                                                                                                                                                                           | 0                                                                                                                                                                                                                                                                                                                                                                                                                                                                                            |           |                    |   |   |   |   |   |   |   |   |   |   |   |   |   |    |   |    |   |    |
| 2                                                                                                                                                                                                                                                                                                                                                                                                                                                                                                                                                                           | 0                                                                                                                                                                                                                                                                                                                                                                                                                                                                                            |           |                    |   |   |   |   |   |   |   |   |   |   |   |   |   |    |   |    |   |    |
| 3                                                                                                                                                                                                                                                                                                                                                                                                                                                                                                                                                                           | 0                                                                                                                                                                                                                                                                                                                                                                                                                                                                                            |           |                    |   |   |   |   |   |   |   |   |   |   |   |   |   |    |   |    |   |    |
| 4                                                                                                                                                                                                                                                                                                                                                                                                                                                                                                                                                                           | 0                                                                                                                                                                                                                                                                                                                                                                                                                                                                                            |           |                    |   |   |   |   |   |   |   |   |   |   |   |   |   |    |   |    |   |    |
| 5                                                                                                                                                                                                                                                                                                                                                                                                                                                                                                                                                                           | 0                                                                                                                                                                                                                                                                                                                                                                                                                                                                                            |           |                    |   |   |   |   |   |   |   |   |   |   |   |   |   |    |   |    |   |    |
| 6                                                                                                                                                                                                                                                                                                                                                                                                                                                                                                                                                                           | 2                                                                                                                                                                                                                                                                                                                                                                                                                                                                                            |           |                    |   |   |   |   |   |   |   |   |   |   |   |   |   |    |   |    |   |    |
| 7                                                                                                                                                                                                                                                                                                                                                                                                                                                                                                                                                                           | 8                                                                                                                                                                                                                                                                                                                                                                                                                                                                                            |           |                    |   |   |   |   |   |   |   |   |   |   |   |   |   |    |   |    |   |    |
| 8                                                                                                                                                                                                                                                                                                                                                                                                                                                                                                                                                                           | 16                                                                                                                                                                                                                                                                                                                                                                                                                                                                                           |           |                    |   |   |   |   |   |   |   |   |   |   |   |   |   |    |   |    |   |    |
| 9                                                                                                                                                                                                                                                                                                                                                                                                                                                                                                                                                                           | 18                                                                                                                                                                                                                                                                                                                                                                                                                                                                                           |           |                    |   |   |   |   |   |   |   |   |   |   |   |   |   |    |   |    |   |    |
| <p>7. STAGE IVb DISEASE: Upfront curative intent local treatment without peri-procedural systemic therapy is the appropriate therapy if the surgical procedure, with or without ablative treatment, is considered complex (major hepatectomy +/- ablations), with the following two exemptions where 4-6 cycles of induction systemic therapy are indicated: (a) if downsizing systemic therapy is likely to reduce the surgical risk or (b) in case of early metachronous disease developed within 6 months following primary tumor diagnosis (test of tumor biology).</p> |  <table border="1"> <thead> <tr> <th>CCI Score</th> <th>Number of Patients</th> </tr> </thead> <tbody> <tr><td>1</td><td>0</td></tr> <tr><td>2</td><td>0</td></tr> <tr><td>3</td><td>0</td></tr> <tr><td>4</td><td>1</td></tr> <tr><td>5</td><td>1</td></tr> <tr><td>6</td><td>1</td></tr> <tr><td>7</td><td>11</td></tr> <tr><td>8</td><td>11</td></tr> <tr><td>9</td><td>7</td></tr> </tbody> </table> | CCI Score | Number of Patients | 1 | 0 | 2 | 0 | 3 | 0 | 4 | 1 | 5 | 1 | 6 | 1 | 7 | 11 | 8 | 11 | 9 | 7  |
| CCI Score                                                                                                                                                                                                                                                                                                                                                                                                                                                                                                                                                                   | Number of Patients                                                                                                                                                                                                                                                                                                                                                                                                                                                                           |           |                    |   |   |   |   |   |   |   |   |   |   |   |   |   |    |   |    |   |    |
| 1                                                                                                                                                                                                                                                                                                                                                                                                                                                                                                                                                                           | 0                                                                                                                                                                                                                                                                                                                                                                                                                                                                                            |           |                    |   |   |   |   |   |   |   |   |   |   |   |   |   |    |   |    |   |    |
| 2                                                                                                                                                                                                                                                                                                                                                                                                                                                                                                                                                                           | 0                                                                                                                                                                                                                                                                                                                                                                                                                                                                                            |           |                    |   |   |   |   |   |   |   |   |   |   |   |   |   |    |   |    |   |    |
| 3                                                                                                                                                                                                                                                                                                                                                                                                                                                                                                                                                                           | 0                                                                                                                                                                                                                                                                                                                                                                                                                                                                                            |           |                    |   |   |   |   |   |   |   |   |   |   |   |   |   |    |   |    |   |    |
| 4                                                                                                                                                                                                                                                                                                                                                                                                                                                                                                                                                                           | 1                                                                                                                                                                                                                                                                                                                                                                                                                                                                                            |           |                    |   |   |   |   |   |   |   |   |   |   |   |   |   |    |   |    |   |    |
| 5                                                                                                                                                                                                                                                                                                                                                                                                                                                                                                                                                                           | 1                                                                                                                                                                                                                                                                                                                                                                                                                                                                                            |           |                    |   |   |   |   |   |   |   |   |   |   |   |   |   |    |   |    |   |    |
| 6                                                                                                                                                                                                                                                                                                                                                                                                                                                                                                                                                                           | 1                                                                                                                                                                                                                                                                                                                                                                                                                                                                                            |           |                    |   |   |   |   |   |   |   |   |   |   |   |   |   |    |   |    |   |    |
| 7                                                                                                                                                                                                                                                                                                                                                                                                                                                                                                                                                                           | 11                                                                                                                                                                                                                                                                                                                                                                                                                                                                                           |           |                    |   |   |   |   |   |   |   |   |   |   |   |   |   |    |   |    |   |    |
| 8                                                                                                                                                                                                                                                                                                                                                                                                                                                                                                                                                                           | 11                                                                                                                                                                                                                                                                                                                                                                                                                                                                                           |           |                    |   |   |   |   |   |   |   |   |   |   |   |   |   |    |   |    |   |    |
| 9                                                                                                                                                                                                                                                                                                                                                                                                                                                                                                                                                                           | 7                                                                                                                                                                                                                                                                                                                                                                                                                                                                                            |           |                    |   |   |   |   |   |   |   |   |   |   |   |   |   |    |   |    |   |    |
| <p>8. STAGE IVc DISEASE: In patients, unsuitable for curative intent surgery and/or ablation due to number, size and location of CRLM, with potentially downstagable disease, induction systemic therapy is appropriate until: a) curative intent local treatment has become possible or (b) when</p>                                                                                                                                                                                                                                                                       |  <table border="1"> <thead> <tr> <th>CCI Score</th> <th>Number of Patients</th> </tr> </thead> <tbody> <tr><td>1</td><td>0</td></tr> <tr><td>2</td><td>0</td></tr> <tr><td>3</td><td>0</td></tr> <tr><td>4</td><td>0</td></tr> <tr><td>5</td><td>0</td></tr> <tr><td>6</td><td>3</td></tr> <tr><td>7</td><td>6</td></tr> <tr><td>8</td><td>13</td></tr> <tr><td>9</td><td>22</td></tr> </tbody> </table> | CCI Score | Number of Patients | 1 | 0 | 2 | 0 | 3 | 0 | 4 | 0 | 5 | 0 | 6 | 3 | 7 | 6  | 8 | 13 | 9 | 22 |
| CCI Score                                                                                                                                                                                                                                                                                                                                                                                                                                                                                                                                                                   | Number of Patients                                                                                                                                                                                                                                                                                                                                                                                                                                                                           |           |                    |   |   |   |   |   |   |   |   |   |   |   |   |   |    |   |    |   |    |
| 1                                                                                                                                                                                                                                                                                                                                                                                                                                                                                                                                                                           | 0                                                                                                                                                                                                                                                                                                                                                                                                                                                                                            |           |                    |   |   |   |   |   |   |   |   |   |   |   |   |   |    |   |    |   |    |
| 2                                                                                                                                                                                                                                                                                                                                                                                                                                                                                                                                                                           | 0                                                                                                                                                                                                                                                                                                                                                                                                                                                                                            |           |                    |   |   |   |   |   |   |   |   |   |   |   |   |   |    |   |    |   |    |
| 3                                                                                                                                                                                                                                                                                                                                                                                                                                                                                                                                                                           | 0                                                                                                                                                                                                                                                                                                                                                                                                                                                                                            |           |                    |   |   |   |   |   |   |   |   |   |   |   |   |   |    |   |    |   |    |
| 4                                                                                                                                                                                                                                                                                                                                                                                                                                                                                                                                                                           | 0                                                                                                                                                                                                                                                                                                                                                                                                                                                                                            |           |                    |   |   |   |   |   |   |   |   |   |   |   |   |   |    |   |    |   |    |
| 5                                                                                                                                                                                                                                                                                                                                                                                                                                                                                                                                                                           | 0                                                                                                                                                                                                                                                                                                                                                                                                                                                                                            |           |                    |   |   |   |   |   |   |   |   |   |   |   |   |   |    |   |    |   |    |
| 6                                                                                                                                                                                                                                                                                                                                                                                                                                                                                                                                                                           | 3                                                                                                                                                                                                                                                                                                                                                                                                                                                                                            |           |                    |   |   |   |   |   |   |   |   |   |   |   |   |   |    |   |    |   |    |
| 7                                                                                                                                                                                                                                                                                                                                                                                                                                                                                                                                                                           | 6                                                                                                                                                                                                                                                                                                                                                                                                                                                                                            |           |                    |   |   |   |   |   |   |   |   |   |   |   |   |   |    |   |    |   |    |
| 8                                                                                                                                                                                                                                                                                                                                                                                                                                                                                                                                                                           | 13                                                                                                                                                                                                                                                                                                                                                                                                                                                                                           |           |                    |   |   |   |   |   |   |   |   |   |   |   |   |   |    |   |    |   |    |
| 9                                                                                                                                                                                                                                                                                                                                                                                                                                                                                                                                                                           | 22                                                                                                                                                                                                                                                                                                                                                                                                                                                                                           |           |                    |   |   |   |   |   |   |   |   |   |   |   |   |   |    |   |    |   |    |

| <p>further downsizing will not (further) decrease procedural risk.</p>                                                                                                                                                                                                                                                                                                                                                                                                                                                                                                                                                                                                                                                                                                                                                                      |                                                                                                                                                                                                                                                                                                                                                                                                                                                                                 |          |       |   |   |   |   |   |   |   |   |   |   |   |   |   |    |   |    |   |    |
|---------------------------------------------------------------------------------------------------------------------------------------------------------------------------------------------------------------------------------------------------------------------------------------------------------------------------------------------------------------------------------------------------------------------------------------------------------------------------------------------------------------------------------------------------------------------------------------------------------------------------------------------------------------------------------------------------------------------------------------------------------------------------------------------------------------------------------------------|---------------------------------------------------------------------------------------------------------------------------------------------------------------------------------------------------------------------------------------------------------------------------------------------------------------------------------------------------------------------------------------------------------------------------------------------------------------------------------|----------|-------|---|---|---|---|---|---|---|---|---|---|---|---|---|----|---|----|---|----|
| <p>9. STAGE IVd DISEASE: For liver-only colorectal metastases, the term permanently unsuitable for curative intent local treatment should be reserved for (a) patients who remain ineligible for radical intent local therapy following induction systemic therapy, (b) patients with upfront contra-indications for radical intent local therapy and contra-indications to receive systemic therapy and (c) patients with a poor general health status who do not qualify for any local therapy (SBRT, local ablation and surgery).</p>                                                                                                                                                                                                                                                                                                    | 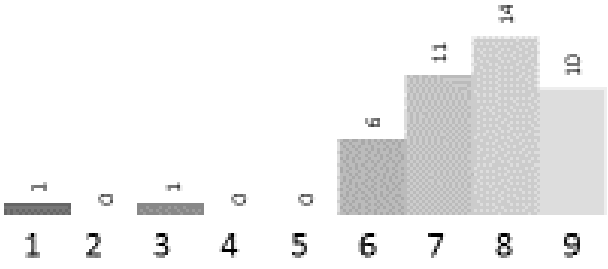 <table border="1"> <thead> <tr> <th>Category</th> <th>Count</th> </tr> </thead> <tbody> <tr><td>1</td><td>1</td></tr> <tr><td>2</td><td>0</td></tr> <tr><td>3</td><td>1</td></tr> <tr><td>4</td><td>0</td></tr> <tr><td>5</td><td>0</td></tr> <tr><td>6</td><td>6</td></tr> <tr><td>7</td><td>11</td></tr> <tr><td>8</td><td>14</td></tr> <tr><td>9</td><td>10</td></tr> </tbody> </table>   | Category | Count | 1 | 1 | 2 | 0 | 3 | 1 | 4 | 0 | 5 | 0 | 6 | 6 | 7 | 11 | 8 | 14 | 9 | 10 |
| Category                                                                                                                                                                                                                                                                                                                                                                                                                                                                                                                                                                                                                                                                                                                                                                                                                                    | Count                                                                                                                                                                                                                                                                                                                                                                                                                                                                           |          |       |   |   |   |   |   |   |   |   |   |   |   |   |   |    |   |    |   |    |
| 1                                                                                                                                                                                                                                                                                                                                                                                                                                                                                                                                                                                                                                                                                                                                                                                                                                           | 1                                                                                                                                                                                                                                                                                                                                                                                                                                                                               |          |       |   |   |   |   |   |   |   |   |   |   |   |   |   |    |   |    |   |    |
| 2                                                                                                                                                                                                                                                                                                                                                                                                                                                                                                                                                                                                                                                                                                                                                                                                                                           | 0                                                                                                                                                                                                                                                                                                                                                                                                                                                                               |          |       |   |   |   |   |   |   |   |   |   |   |   |   |   |    |   |    |   |    |
| 3                                                                                                                                                                                                                                                                                                                                                                                                                                                                                                                                                                                                                                                                                                                                                                                                                                           | 1                                                                                                                                                                                                                                                                                                                                                                                                                                                                               |          |       |   |   |   |   |   |   |   |   |   |   |   |   |   |    |   |    |   |    |
| 4                                                                                                                                                                                                                                                                                                                                                                                                                                                                                                                                                                                                                                                                                                                                                                                                                                           | 0                                                                                                                                                                                                                                                                                                                                                                                                                                                                               |          |       |   |   |   |   |   |   |   |   |   |   |   |   |   |    |   |    |   |    |
| 5                                                                                                                                                                                                                                                                                                                                                                                                                                                                                                                                                                                                                                                                                                                                                                                                                                           | 0                                                                                                                                                                                                                                                                                                                                                                                                                                                                               |          |       |   |   |   |   |   |   |   |   |   |   |   |   |   |    |   |    |   |    |
| 6                                                                                                                                                                                                                                                                                                                                                                                                                                                                                                                                                                                                                                                                                                                                                                                                                                           | 6                                                                                                                                                                                                                                                                                                                                                                                                                                                                               |          |       |   |   |   |   |   |   |   |   |   |   |   |   |   |    |   |    |   |    |
| 7                                                                                                                                                                                                                                                                                                                                                                                                                                                                                                                                                                                                                                                                                                                                                                                                                                           | 11                                                                                                                                                                                                                                                                                                                                                                                                                                                                              |          |       |   |   |   |   |   |   |   |   |   |   |   |   |   |    |   |    |   |    |
| 8                                                                                                                                                                                                                                                                                                                                                                                                                                                                                                                                                                                                                                                                                                                                                                                                                                           | 14                                                                                                                                                                                                                                                                                                                                                                                                                                                                              |          |       |   |   |   |   |   |   |   |   |   |   |   |   |   |    |   |    |   |    |
| 9                                                                                                                                                                                                                                                                                                                                                                                                                                                                                                                                                                                                                                                                                                                                                                                                                                           | 10                                                                                                                                                                                                                                                                                                                                                                                                                                                                              |          |       |   |   |   |   |   |   |   |   |   |   |   |   |   |    |   |    |   |    |
| <p>10. PROGNOSTIC BIOMARKERS: At the prerequisite that the primary tumor plus any locoregional lymph nodes are (or will be) radically resected (or treated with radical intent otherwise), curative intent local treatment can currently not be (dis)qualified or classified to specific local treatment groups based on the following parameters: primary tumor location, synchronous versus metachronous disease, previous (neo)adjuvant therapies for locoregional disease, the best objectified response to systemic treatment, (y)p/cT-stage and (y)p/cN-stage, RAS or BRAF wildtypes or mutations, microsatellite (in)stability, consensus molecular subtypes, clinical risk score (CRS by Fong et al.) and the modified CRS, CEA or other tumor marker quantities, the presence and quantity of circulating tumor cells and DNA.</p> |  <table border="1"> <thead> <tr> <th>Category</th> <th>Count</th> </tr> </thead> <tbody> <tr><td>1</td><td>0</td></tr> <tr><td>2</td><td>0</td></tr> <tr><td>3</td><td>0</td></tr> <tr><td>4</td><td>2</td></tr> <tr><td>5</td><td>1</td></tr> <tr><td>6</td><td>6</td></tr> <tr><td>7</td><td>10</td></tr> <tr><td>8</td><td>14</td></tr> <tr><td>9</td><td>10</td></tr> </tbody> </table> | Category | Count | 1 | 0 | 2 | 0 | 3 | 0 | 4 | 2 | 5 | 1 | 6 | 6 | 7 | 10 | 8 | 14 | 9 | 10 |
| Category                                                                                                                                                                                                                                                                                                                                                                                                                                                                                                                                                                                                                                                                                                                                                                                                                                    | Count                                                                                                                                                                                                                                                                                                                                                                                                                                                                           |          |       |   |   |   |   |   |   |   |   |   |   |   |   |   |    |   |    |   |    |
| 1                                                                                                                                                                                                                                                                                                                                                                                                                                                                                                                                                                                                                                                                                                                                                                                                                                           | 0                                                                                                                                                                                                                                                                                                                                                                                                                                                                               |          |       |   |   |   |   |   |   |   |   |   |   |   |   |   |    |   |    |   |    |
| 2                                                                                                                                                                                                                                                                                                                                                                                                                                                                                                                                                                                                                                                                                                                                                                                                                                           | 0                                                                                                                                                                                                                                                                                                                                                                                                                                                                               |          |       |   |   |   |   |   |   |   |   |   |   |   |   |   |    |   |    |   |    |
| 3                                                                                                                                                                                                                                                                                                                                                                                                                                                                                                                                                                                                                                                                                                                                                                                                                                           | 0                                                                                                                                                                                                                                                                                                                                                                                                                                                                               |          |       |   |   |   |   |   |   |   |   |   |   |   |   |   |    |   |    |   |    |
| 4                                                                                                                                                                                                                                                                                                                                                                                                                                                                                                                                                                                                                                                                                                                                                                                                                                           | 2                                                                                                                                                                                                                                                                                                                                                                                                                                                                               |          |       |   |   |   |   |   |   |   |   |   |   |   |   |   |    |   |    |   |    |
| 5                                                                                                                                                                                                                                                                                                                                                                                                                                                                                                                                                                                                                                                                                                                                                                                                                                           | 1                                                                                                                                                                                                                                                                                                                                                                                                                                                                               |          |       |   |   |   |   |   |   |   |   |   |   |   |   |   |    |   |    |   |    |
| 6                                                                                                                                                                                                                                                                                                                                                                                                                                                                                                                                                                                                                                                                                                                                                                                                                                           | 6                                                                                                                                                                                                                                                                                                                                                                                                                                                                               |          |       |   |   |   |   |   |   |   |   |   |   |   |   |   |    |   |    |   |    |
| 7                                                                                                                                                                                                                                                                                                                                                                                                                                                                                                                                                                                                                                                                                                                                                                                                                                           | 10                                                                                                                                                                                                                                                                                                                                                                                                                                                                              |          |       |   |   |   |   |   |   |   |   |   |   |   |   |   |    |   |    |   |    |
| 8                                                                                                                                                                                                                                                                                                                                                                                                                                                                                                                                                                                                                                                                                                                                                                                                                                           | 14                                                                                                                                                                                                                                                                                                                                                                                                                                                                              |          |       |   |   |   |   |   |   |   |   |   |   |   |   |   |    |   |    |   |    |
| 9                                                                                                                                                                                                                                                                                                                                                                                                                                                                                                                                                                                                                                                                                                                                                                                                                                           | 10                                                                                                                                                                                                                                                                                                                                                                                                                                                                              |          |       |   |   |   |   |   |   |   |   |   |   |   |   |   |    |   |    |   |    |

| <p>11. FUTURE LIVER REMNANT (FLR) VOLUME AND/OR FUNCTION: <i>If the FLR volume and/or function is sufficient, curative-intent local therapy for CRLM is appropriate, regardless of the total number of CRLM; patients cannot be disqualified based on the total number of CRLM alone.</i></p> | 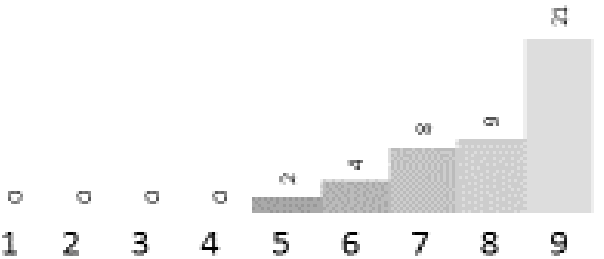 <table border="1"> <thead> <tr> <th>CRLM Count</th> <th>Number of Patients</th> </tr> </thead> <tbody> <tr><td>1</td><td>0</td></tr> <tr><td>2</td><td>0</td></tr> <tr><td>3</td><td>0</td></tr> <tr><td>4</td><td>0</td></tr> <tr><td>5</td><td>2</td></tr> <tr><td>6</td><td>4</td></tr> <tr><td>7</td><td>8</td></tr> <tr><td>8</td><td>9</td></tr> <tr><td>9</td><td>21</td></tr> </tbody> </table>     | CRLM Count | Number of Patients | 1 | 0 | 2 | 0 | 3 | 0 | 4 | 0 | 5 | 2 | 6 | 4 | 7 | 8  | 8 | 9  | 9 | 21 |
|-----------------------------------------------------------------------------------------------------------------------------------------------------------------------------------------------------------------------------------------------------------------------------------------------|------------------------------------------------------------------------------------------------------------------------------------------------------------------------------------------------------------------------------------------------------------------------------------------------------------------------------------------------------------------------------------------------------------------------------------------------------------------------------------------------|------------|--------------------|---|---|---|---|---|---|---|---|---|---|---|---|---|----|---|----|---|----|
| CRLM Count                                                                                                                                                                                                                                                                                    | Number of Patients                                                                                                                                                                                                                                                                                                                                                                                                                                                                             |            |                    |   |   |   |   |   |   |   |   |   |   |   |   |   |    |   |    |   |    |
| 1                                                                                                                                                                                                                                                                                             | 0                                                                                                                                                                                                                                                                                                                                                                                                                                                                                              |            |                    |   |   |   |   |   |   |   |   |   |   |   |   |   |    |   |    |   |    |
| 2                                                                                                                                                                                                                                                                                             | 0                                                                                                                                                                                                                                                                                                                                                                                                                                                                                              |            |                    |   |   |   |   |   |   |   |   |   |   |   |   |   |    |   |    |   |    |
| 3                                                                                                                                                                                                                                                                                             | 0                                                                                                                                                                                                                                                                                                                                                                                                                                                                                              |            |                    |   |   |   |   |   |   |   |   |   |   |   |   |   |    |   |    |   |    |
| 4                                                                                                                                                                                                                                                                                             | 0                                                                                                                                                                                                                                                                                                                                                                                                                                                                                              |            |                    |   |   |   |   |   |   |   |   |   |   |   |   |   |    |   |    |   |    |
| 5                                                                                                                                                                                                                                                                                             | 2                                                                                                                                                                                                                                                                                                                                                                                                                                                                                              |            |                    |   |   |   |   |   |   |   |   |   |   |   |   |   |    |   |    |   |    |
| 6                                                                                                                                                                                                                                                                                             | 4                                                                                                                                                                                                                                                                                                                                                                                                                                                                                              |            |                    |   |   |   |   |   |   |   |   |   |   |   |   |   |    |   |    |   |    |
| 7                                                                                                                                                                                                                                                                                             | 8                                                                                                                                                                                                                                                                                                                                                                                                                                                                                              |            |                    |   |   |   |   |   |   |   |   |   |   |   |   |   |    |   |    |   |    |
| 8                                                                                                                                                                                                                                                                                             | 9                                                                                                                                                                                                                                                                                                                                                                                                                                                                                              |            |                    |   |   |   |   |   |   |   |   |   |   |   |   |   |    |   |    |   |    |
| 9                                                                                                                                                                                                                                                                                             | 21                                                                                                                                                                                                                                                                                                                                                                                                                                                                                             |            |                    |   |   |   |   |   |   |   |   |   |   |   |   |   |    |   |    |   |    |
| <p>12. <i>Partial hepatectomy is the appropriate local treatment method for patients with resectable CRLM &gt;3cm, at the prerequisite that ECOG is ≤2, ASA is ≤3 and CCI is ≤8.</i></p>                                                                                                      |  <table border="1"> <thead> <tr> <th>CRLM Count</th> <th>Number of Patients</th> </tr> </thead> <tbody> <tr><td>1</td><td>0</td></tr> <tr><td>2</td><td>0</td></tr> <tr><td>3</td><td>0</td></tr> <tr><td>4</td><td>2</td></tr> <tr><td>5</td><td>0</td></tr> <tr><td>6</td><td>3</td></tr> <tr><td>7</td><td>10</td></tr> <tr><td>8</td><td>7</td></tr> <tr><td>9</td><td>23</td></tr> </tbody> </table>    | CRLM Count | Number of Patients | 1 | 0 | 2 | 0 | 3 | 0 | 4 | 2 | 5 | 0 | 6 | 3 | 7 | 10 | 8 | 7  | 9 | 23 |
| CRLM Count                                                                                                                                                                                                                                                                                    | Number of Patients                                                                                                                                                                                                                                                                                                                                                                                                                                                                             |            |                    |   |   |   |   |   |   |   |   |   |   |   |   |   |    |   |    |   |    |
| 1                                                                                                                                                                                                                                                                                             | 0                                                                                                                                                                                                                                                                                                                                                                                                                                                                                              |            |                    |   |   |   |   |   |   |   |   |   |   |   |   |   |    |   |    |   |    |
| 2                                                                                                                                                                                                                                                                                             | 0                                                                                                                                                                                                                                                                                                                                                                                                                                                                                              |            |                    |   |   |   |   |   |   |   |   |   |   |   |   |   |    |   |    |   |    |
| 3                                                                                                                                                                                                                                                                                             | 0                                                                                                                                                                                                                                                                                                                                                                                                                                                                                              |            |                    |   |   |   |   |   |   |   |   |   |   |   |   |   |    |   |    |   |    |
| 4                                                                                                                                                                                                                                                                                             | 2                                                                                                                                                                                                                                                                                                                                                                                                                                                                                              |            |                    |   |   |   |   |   |   |   |   |   |   |   |   |   |    |   |    |   |    |
| 5                                                                                                                                                                                                                                                                                             | 0                                                                                                                                                                                                                                                                                                                                                                                                                                                                                              |            |                    |   |   |   |   |   |   |   |   |   |   |   |   |   |    |   |    |   |    |
| 6                                                                                                                                                                                                                                                                                             | 3                                                                                                                                                                                                                                                                                                                                                                                                                                                                                              |            |                    |   |   |   |   |   |   |   |   |   |   |   |   |   |    |   |    |   |    |
| 7                                                                                                                                                                                                                                                                                             | 10                                                                                                                                                                                                                                                                                                                                                                                                                                                                                             |            |                    |   |   |   |   |   |   |   |   |   |   |   |   |   |    |   |    |   |    |
| 8                                                                                                                                                                                                                                                                                             | 7                                                                                                                                                                                                                                                                                                                                                                                                                                                                                              |            |                    |   |   |   |   |   |   |   |   |   |   |   |   |   |    |   |    |   |    |
| 9                                                                                                                                                                                                                                                                                             | 23                                                                                                                                                                                                                                                                                                                                                                                                                                                                                             |            |                    |   |   |   |   |   |   |   |   |   |   |   |   |   |    |   |    |   |    |
| <p>13. <i>Partial hepatectomy is the appropriate local treatment method for patients with resectable exophytic or perihilar CRLM ≤3cm, at the prerequisite that ECOG is ≤2, ASA is ≤3 and CCI is ≤8.</i></p>                                                                                  |  <table border="1"> <thead> <tr> <th>CRLM Count</th> <th>Number of Patients</th> </tr> </thead> <tbody> <tr><td>1</td><td>1</td></tr> <tr><td>2</td><td>1</td></tr> <tr><td>3</td><td>2</td></tr> <tr><td>4</td><td>1</td></tr> <tr><td>5</td><td>2</td></tr> <tr><td>6</td><td>2</td></tr> <tr><td>7</td><td>13</td></tr> <tr><td>8</td><td>10</td></tr> <tr><td>9</td><td>12</td></tr> </tbody> </table> | CRLM Count | Number of Patients | 1 | 1 | 2 | 1 | 3 | 2 | 4 | 1 | 5 | 2 | 6 | 2 | 7 | 13 | 8 | 10 | 9 | 12 |
| CRLM Count                                                                                                                                                                                                                                                                                    | Number of Patients                                                                                                                                                                                                                                                                                                                                                                                                                                                                             |            |                    |   |   |   |   |   |   |   |   |   |   |   |   |   |    |   |    |   |    |
| 1                                                                                                                                                                                                                                                                                             | 1                                                                                                                                                                                                                                                                                                                                                                                                                                                                                              |            |                    |   |   |   |   |   |   |   |   |   |   |   |   |   |    |   |    |   |    |
| 2                                                                                                                                                                                                                                                                                             | 1                                                                                                                                                                                                                                                                                                                                                                                                                                                                                              |            |                    |   |   |   |   |   |   |   |   |   |   |   |   |   |    |   |    |   |    |
| 3                                                                                                                                                                                                                                                                                             | 2                                                                                                                                                                                                                                                                                                                                                                                                                                                                                              |            |                    |   |   |   |   |   |   |   |   |   |   |   |   |   |    |   |    |   |    |
| 4                                                                                                                                                                                                                                                                                             | 1                                                                                                                                                                                                                                                                                                                                                                                                                                                                                              |            |                    |   |   |   |   |   |   |   |   |   |   |   |   |   |    |   |    |   |    |
| 5                                                                                                                                                                                                                                                                                             | 2                                                                                                                                                                                                                                                                                                                                                                                                                                                                                              |            |                    |   |   |   |   |   |   |   |   |   |   |   |   |   |    |   |    |   |    |
| 6                                                                                                                                                                                                                                                                                             | 2                                                                                                                                                                                                                                                                                                                                                                                                                                                                                              |            |                    |   |   |   |   |   |   |   |   |   |   |   |   |   |    |   |    |   |    |
| 7                                                                                                                                                                                                                                                                                             | 13                                                                                                                                                                                                                                                                                                                                                                                                                                                                                             |            |                    |   |   |   |   |   |   |   |   |   |   |   |   |   |    |   |    |   |    |
| 8                                                                                                                                                                                                                                                                                             | 10                                                                                                                                                                                                                                                                                                                                                                                                                                                                                             |            |                    |   |   |   |   |   |   |   |   |   |   |   |   |   |    |   |    |   |    |
| 9                                                                                                                                                                                                                                                                                             | 12                                                                                                                                                                                                                                                                                                                                                                                                                                                                                             |            |                    |   |   |   |   |   |   |   |   |   |   |   |   |   |    |   |    |   |    |
| <p>14. <i>Partial hepatectomy is the appropriate local treatment method for patients with resectable superficial or shallow CRLM ≤3cm, at the prerequisite that the general health status is <u>good</u> (ECOG ≤1, ASA ≤3 and CCI ≤4).</i></p>                                                |  <table border="1"> <thead> <tr> <th>CRLM Count</th> <th>Number of Patients</th> </tr> </thead> <tbody> <tr><td>1</td><td>0</td></tr> <tr><td>2</td><td>0</td></tr> <tr><td>3</td><td>1</td></tr> <tr><td>4</td><td>2</td></tr> <tr><td>5</td><td>0</td></tr> <tr><td>6</td><td>1</td></tr> <tr><td>7</td><td>7</td></tr> <tr><td>8</td><td>9</td></tr> <tr><td>9</td><td>12</td></tr> </tbody> </table>   | CRLM Count | Number of Patients | 1 | 0 | 2 | 0 | 3 | 1 | 4 | 2 | 5 | 0 | 6 | 1 | 7 | 7  | 8 | 9  | 9 | 12 |
| CRLM Count                                                                                                                                                                                                                                                                                    | Number of Patients                                                                                                                                                                                                                                                                                                                                                                                                                                                                             |            |                    |   |   |   |   |   |   |   |   |   |   |   |   |   |    |   |    |   |    |
| 1                                                                                                                                                                                                                                                                                             | 0                                                                                                                                                                                                                                                                                                                                                                                                                                                                                              |            |                    |   |   |   |   |   |   |   |   |   |   |   |   |   |    |   |    |   |    |
| 2                                                                                                                                                                                                                                                                                             | 0                                                                                                                                                                                                                                                                                                                                                                                                                                                                                              |            |                    |   |   |   |   |   |   |   |   |   |   |   |   |   |    |   |    |   |    |
| 3                                                                                                                                                                                                                                                                                             | 1                                                                                                                                                                                                                                                                                                                                                                                                                                                                                              |            |                    |   |   |   |   |   |   |   |   |   |   |   |   |   |    |   |    |   |    |
| 4                                                                                                                                                                                                                                                                                             | 2                                                                                                                                                                                                                                                                                                                                                                                                                                                                                              |            |                    |   |   |   |   |   |   |   |   |   |   |   |   |   |    |   |    |   |    |
| 5                                                                                                                                                                                                                                                                                             | 0                                                                                                                                                                                                                                                                                                                                                                                                                                                                                              |            |                    |   |   |   |   |   |   |   |   |   |   |   |   |   |    |   |    |   |    |
| 6                                                                                                                                                                                                                                                                                             | 1                                                                                                                                                                                                                                                                                                                                                                                                                                                                                              |            |                    |   |   |   |   |   |   |   |   |   |   |   |   |   |    |   |    |   |    |
| 7                                                                                                                                                                                                                                                                                             | 7                                                                                                                                                                                                                                                                                                                                                                                                                                                                                              |            |                    |   |   |   |   |   |   |   |   |   |   |   |   |   |    |   |    |   |    |
| 8                                                                                                                                                                                                                                                                                             | 9                                                                                                                                                                                                                                                                                                                                                                                                                                                                                              |            |                    |   |   |   |   |   |   |   |   |   |   |   |   |   |    |   |    |   |    |
| 9                                                                                                                                                                                                                                                                                             | 12                                                                                                                                                                                                                                                                                                                                                                                                                                                                                             |            |                    |   |   |   |   |   |   |   |   |   |   |   |   |   |    |   |    |   |    |

| <p>15. Thermal ablation can be considered for patients with resectable superficial or shallow CRLM <math>\leq 3\text{cm}</math>, if the general health status is <u>poor</u> (ECOG 2 and ASA 3 or CCI 5-8).</p>                                                                                                                                                              | 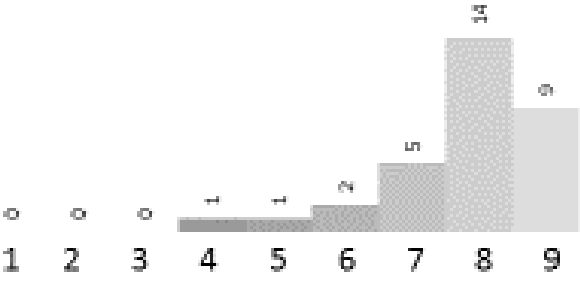 <table border="1"> <thead> <tr> <th>CCI Score</th> <th>Count</th> </tr> </thead> <tbody> <tr><td>1</td><td>0</td></tr> <tr><td>2</td><td>0</td></tr> <tr><td>3</td><td>0</td></tr> <tr><td>4</td><td>1</td></tr> <tr><td>5</td><td>1</td></tr> <tr><td>6</td><td>2</td></tr> <tr><td>7</td><td>5</td></tr> <tr><td>8</td><td>14</td></tr> <tr><td>9</td><td>9</td></tr> </tbody> </table>   | CCI Score | Count | 1 | 0 | 2 | 0 | 3 | 0 | 4 | 1 | 5 | 1 | 6 | 2 | 7 | 5  | 8 | 14 | 9 | 9  |
|------------------------------------------------------------------------------------------------------------------------------------------------------------------------------------------------------------------------------------------------------------------------------------------------------------------------------------------------------------------------------|--------------------------------------------------------------------------------------------------------------------------------------------------------------------------------------------------------------------------------------------------------------------------------------------------------------------------------------------------------------------------------------------------------------------------------------------------------------------------------|-----------|-------|---|---|---|---|---|---|---|---|---|---|---|---|---|----|---|----|---|----|
| CCI Score                                                                                                                                                                                                                                                                                                                                                                    | Count                                                                                                                                                                                                                                                                                                                                                                                                                                                                          |           |       |   |   |   |   |   |   |   |   |   |   |   |   |   |    |   |    |   |    |
| 1                                                                                                                                                                                                                                                                                                                                                                            | 0                                                                                                                                                                                                                                                                                                                                                                                                                                                                              |           |       |   |   |   |   |   |   |   |   |   |   |   |   |   |    |   |    |   |    |
| 2                                                                                                                                                                                                                                                                                                                                                                            | 0                                                                                                                                                                                                                                                                                                                                                                                                                                                                              |           |       |   |   |   |   |   |   |   |   |   |   |   |   |   |    |   |    |   |    |
| 3                                                                                                                                                                                                                                                                                                                                                                            | 0                                                                                                                                                                                                                                                                                                                                                                                                                                                                              |           |       |   |   |   |   |   |   |   |   |   |   |   |   |   |    |   |    |   |    |
| 4                                                                                                                                                                                                                                                                                                                                                                            | 1                                                                                                                                                                                                                                                                                                                                                                                                                                                                              |           |       |   |   |   |   |   |   |   |   |   |   |   |   |   |    |   |    |   |    |
| 5                                                                                                                                                                                                                                                                                                                                                                            | 1                                                                                                                                                                                                                                                                                                                                                                                                                                                                              |           |       |   |   |   |   |   |   |   |   |   |   |   |   |   |    |   |    |   |    |
| 6                                                                                                                                                                                                                                                                                                                                                                            | 2                                                                                                                                                                                                                                                                                                                                                                                                                                                                              |           |       |   |   |   |   |   |   |   |   |   |   |   |   |   |    |   |    |   |    |
| 7                                                                                                                                                                                                                                                                                                                                                                            | 5                                                                                                                                                                                                                                                                                                                                                                                                                                                                              |           |       |   |   |   |   |   |   |   |   |   |   |   |   |   |    |   |    |   |    |
| 8                                                                                                                                                                                                                                                                                                                                                                            | 14                                                                                                                                                                                                                                                                                                                                                                                                                                                                             |           |       |   |   |   |   |   |   |   |   |   |   |   |   |   |    |   |    |   |    |
| 9                                                                                                                                                                                                                                                                                                                                                                            | 9                                                                                                                                                                                                                                                                                                                                                                                                                                                                              |           |       |   |   |   |   |   |   |   |   |   |   |   |   |   |    |   |    |   |    |
| <p>16. Thermal ablation is the appropriate local treatment method for patients with resectable and thermally ablatable CRLM <math>\leq 3\text{cm}</math>, if the location of the CRLM is deep-seated (e.g. resection would require major hepatectomy), at the prerequisite that ECOG is <math>\leq 2</math>, ASA is <math>\leq 3</math> and CCI is <math>\leq 8</math>.</p>  |  <table border="1"> <thead> <tr> <th>CCI Score</th> <th>Count</th> </tr> </thead> <tbody> <tr><td>1</td><td>0</td></tr> <tr><td>2</td><td>0</td></tr> <tr><td>3</td><td>1</td></tr> <tr><td>4</td><td>1</td></tr> <tr><td>5</td><td>2</td></tr> <tr><td>6</td><td>4</td></tr> <tr><td>7</td><td>8</td></tr> <tr><td>8</td><td>16</td></tr> <tr><td>9</td><td>12</td></tr> </tbody> </table>  | CCI Score | Count | 1 | 0 | 2 | 0 | 3 | 1 | 4 | 1 | 5 | 2 | 6 | 4 | 7 | 8  | 8 | 16 | 9 | 12 |
| CCI Score                                                                                                                                                                                                                                                                                                                                                                    | Count                                                                                                                                                                                                                                                                                                                                                                                                                                                                          |           |       |   |   |   |   |   |   |   |   |   |   |   |   |   |    |   |    |   |    |
| 1                                                                                                                                                                                                                                                                                                                                                                            | 0                                                                                                                                                                                                                                                                                                                                                                                                                                                                              |           |       |   |   |   |   |   |   |   |   |   |   |   |   |   |    |   |    |   |    |
| 2                                                                                                                                                                                                                                                                                                                                                                            | 0                                                                                                                                                                                                                                                                                                                                                                                                                                                                              |           |       |   |   |   |   |   |   |   |   |   |   |   |   |   |    |   |    |   |    |
| 3                                                                                                                                                                                                                                                                                                                                                                            | 1                                                                                                                                                                                                                                                                                                                                                                                                                                                                              |           |       |   |   |   |   |   |   |   |   |   |   |   |   |   |    |   |    |   |    |
| 4                                                                                                                                                                                                                                                                                                                                                                            | 1                                                                                                                                                                                                                                                                                                                                                                                                                                                                              |           |       |   |   |   |   |   |   |   |   |   |   |   |   |   |    |   |    |   |    |
| 5                                                                                                                                                                                                                                                                                                                                                                            | 2                                                                                                                                                                                                                                                                                                                                                                                                                                                                              |           |       |   |   |   |   |   |   |   |   |   |   |   |   |   |    |   |    |   |    |
| 6                                                                                                                                                                                                                                                                                                                                                                            | 4                                                                                                                                                                                                                                                                                                                                                                                                                                                                              |           |       |   |   |   |   |   |   |   |   |   |   |   |   |   |    |   |    |   |    |
| 7                                                                                                                                                                                                                                                                                                                                                                            | 8                                                                                                                                                                                                                                                                                                                                                                                                                                                                              |           |       |   |   |   |   |   |   |   |   |   |   |   |   |   |    |   |    |   |    |
| 8                                                                                                                                                                                                                                                                                                                                                                            | 16                                                                                                                                                                                                                                                                                                                                                                                                                                                                             |           |       |   |   |   |   |   |   |   |   |   |   |   |   |   |    |   |    |   |    |
| 9                                                                                                                                                                                                                                                                                                                                                                            | 12                                                                                                                                                                                                                                                                                                                                                                                                                                                                             |           |       |   |   |   |   |   |   |   |   |   |   |   |   |   |    |   |    |   |    |
| <p>17. Thermal ablation is the appropriate local treatment method for patients with unresectable and thermally ablatable CRLM <math>\leq 3\text{cm}</math>, and can be considered for CRLM 3-5cm when (further) downsizing systemic therapy is unfeasible, at the prerequisite that CCI <math>\leq 8</math>, ASA is <math>\leq 3</math> and ECOG is <math>\leq 2</math>.</p> |  <table border="1"> <thead> <tr> <th>CCI Score</th> <th>Count</th> </tr> </thead> <tbody> <tr><td>1</td><td>0</td></tr> <tr><td>2</td><td>0</td></tr> <tr><td>3</td><td>1</td></tr> <tr><td>4</td><td>0</td></tr> <tr><td>5</td><td>0</td></tr> <tr><td>6</td><td>5</td></tr> <tr><td>7</td><td>3</td></tr> <tr><td>8</td><td>13</td></tr> <tr><td>9</td><td>10</td></tr> </tbody> </table> | CCI Score | Count | 1 | 0 | 2 | 0 | 3 | 1 | 4 | 0 | 5 | 0 | 6 | 5 | 7 | 3  | 8 | 13 | 9 | 10 |
| CCI Score                                                                                                                                                                                                                                                                                                                                                                    | Count                                                                                                                                                                                                                                                                                                                                                                                                                                                                          |           |       |   |   |   |   |   |   |   |   |   |   |   |   |   |    |   |    |   |    |
| 1                                                                                                                                                                                                                                                                                                                                                                            | 0                                                                                                                                                                                                                                                                                                                                                                                                                                                                              |           |       |   |   |   |   |   |   |   |   |   |   |   |   |   |    |   |    |   |    |
| 2                                                                                                                                                                                                                                                                                                                                                                            | 0                                                                                                                                                                                                                                                                                                                                                                                                                                                                              |           |       |   |   |   |   |   |   |   |   |   |   |   |   |   |    |   |    |   |    |
| 3                                                                                                                                                                                                                                                                                                                                                                            | 1                                                                                                                                                                                                                                                                                                                                                                                                                                                                              |           |       |   |   |   |   |   |   |   |   |   |   |   |   |   |    |   |    |   |    |
| 4                                                                                                                                                                                                                                                                                                                                                                            | 0                                                                                                                                                                                                                                                                                                                                                                                                                                                                              |           |       |   |   |   |   |   |   |   |   |   |   |   |   |   |    |   |    |   |    |
| 5                                                                                                                                                                                                                                                                                                                                                                            | 0                                                                                                                                                                                                                                                                                                                                                                                                                                                                              |           |       |   |   |   |   |   |   |   |   |   |   |   |   |   |    |   |    |   |    |
| 6                                                                                                                                                                                                                                                                                                                                                                            | 5                                                                                                                                                                                                                                                                                                                                                                                                                                                                              |           |       |   |   |   |   |   |   |   |   |   |   |   |   |   |    |   |    |   |    |
| 7                                                                                                                                                                                                                                                                                                                                                                            | 3                                                                                                                                                                                                                                                                                                                                                                                                                                                                              |           |       |   |   |   |   |   |   |   |   |   |   |   |   |   |    |   |    |   |    |
| 8                                                                                                                                                                                                                                                                                                                                                                            | 13                                                                                                                                                                                                                                                                                                                                                                                                                                                                             |           |       |   |   |   |   |   |   |   |   |   |   |   |   |   |    |   |    |   |    |
| 9                                                                                                                                                                                                                                                                                                                                                                            | 10                                                                                                                                                                                                                                                                                                                                                                                                                                                                             |           |       |   |   |   |   |   |   |   |   |   |   |   |   |   |    |   |    |   |    |
| <p>18. Irreversible electroporation (IRE) can be considered for patients with unresectable and not thermally ablatable perihilar or perivascular CRLM <math>\leq 3\text{cm}</math>, and 3-5cm if further downsizing systemic therapy is unfeasible, at the prerequisite that CCI is <math>\leq 8</math>, ASA is <math>\leq 3</math> and ECOG is <math>\leq 2</math>.</p>     |  <table border="1"> <thead> <tr> <th>CCI Score</th> <th>Count</th> </tr> </thead> <tbody> <tr><td>1</td><td>0</td></tr> <tr><td>2</td><td>1</td></tr> <tr><td>3</td><td>0</td></tr> <tr><td>4</td><td>2</td></tr> <tr><td>5</td><td>1</td></tr> <tr><td>6</td><td>3</td></tr> <tr><td>7</td><td>11</td></tr> <tr><td>8</td><td>5</td></tr> <tr><td>9</td><td>7</td></tr> </tbody> </table> | CCI Score | Count | 1 | 0 | 2 | 1 | 3 | 0 | 4 | 2 | 5 | 1 | 6 | 3 | 7 | 11 | 8 | 5  | 9 | 7  |
| CCI Score                                                                                                                                                                                                                                                                                                                                                                    | Count                                                                                                                                                                                                                                                                                                                                                                                                                                                                          |           |       |   |   |   |   |   |   |   |   |   |   |   |   |   |    |   |    |   |    |
| 1                                                                                                                                                                                                                                                                                                                                                                            | 0                                                                                                                                                                                                                                                                                                                                                                                                                                                                              |           |       |   |   |   |   |   |   |   |   |   |   |   |   |   |    |   |    |   |    |
| 2                                                                                                                                                                                                                                                                                                                                                                            | 1                                                                                                                                                                                                                                                                                                                                                                                                                                                                              |           |       |   |   |   |   |   |   |   |   |   |   |   |   |   |    |   |    |   |    |
| 3                                                                                                                                                                                                                                                                                                                                                                            | 0                                                                                                                                                                                                                                                                                                                                                                                                                                                                              |           |       |   |   |   |   |   |   |   |   |   |   |   |   |   |    |   |    |   |    |
| 4                                                                                                                                                                                                                                                                                                                                                                            | 2                                                                                                                                                                                                                                                                                                                                                                                                                                                                              |           |       |   |   |   |   |   |   |   |   |   |   |   |   |   |    |   |    |   |    |
| 5                                                                                                                                                                                                                                                                                                                                                                            | 1                                                                                                                                                                                                                                                                                                                                                                                                                                                                              |           |       |   |   |   |   |   |   |   |   |   |   |   |   |   |    |   |    |   |    |
| 6                                                                                                                                                                                                                                                                                                                                                                            | 3                                                                                                                                                                                                                                                                                                                                                                                                                                                                              |           |       |   |   |   |   |   |   |   |   |   |   |   |   |   |    |   |    |   |    |
| 7                                                                                                                                                                                                                                                                                                                                                                            | 11                                                                                                                                                                                                                                                                                                                                                                                                                                                                             |           |       |   |   |   |   |   |   |   |   |   |   |   |   |   |    |   |    |   |    |
| 8                                                                                                                                                                                                                                                                                                                                                                            | 5                                                                                                                                                                                                                                                                                                                                                                                                                                                                              |           |       |   |   |   |   |   |   |   |   |   |   |   |   |   |    |   |    |   |    |
| 9                                                                                                                                                                                                                                                                                                                                                                            | 7                                                                                                                                                                                                                                                                                                                                                                                                                                                                              |           |       |   |   |   |   |   |   |   |   |   |   |   |   |   |    |   |    |   |    |

| <p>19. Stereotactic ablative radiotherapy (SBRT) can be considered for patients with limited disease burden (<math>\leq 3</math> CRLM) if an ablative dose can be delivered without jeopardizing liver function and other organs or structures at risk, at the prerequisite that ECOG is <math>\leq 3</math>, ASA is <math>\leq 4</math> and CCI is <math>\leq 10</math>.</p>                                                                                                                                                                                                                                                                                                                                         | 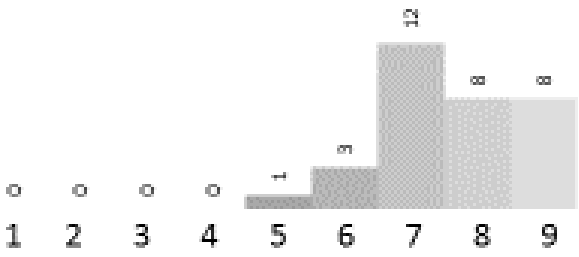 <table border="1"> <thead> <tr> <th>Score</th> <th>Count</th> </tr> </thead> <tbody> <tr><td>1</td><td>0</td></tr> <tr><td>2</td><td>0</td></tr> <tr><td>3</td><td>0</td></tr> <tr><td>4</td><td>0</td></tr> <tr><td>5</td><td>1</td></tr> <tr><td>6</td><td>3</td></tr> <tr><td>7</td><td>10</td></tr> <tr><td>8</td><td>8</td></tr> <tr><td>9</td><td>8</td></tr> </tbody> </table>  | Score | Count | 1 | 0 | 2 | 0 | 3 | 0 | 4 | 0 | 5 | 1 | 6 | 3 | 7 | 10 | 8 | 8 | 9 | 8 |
|-----------------------------------------------------------------------------------------------------------------------------------------------------------------------------------------------------------------------------------------------------------------------------------------------------------------------------------------------------------------------------------------------------------------------------------------------------------------------------------------------------------------------------------------------------------------------------------------------------------------------------------------------------------------------------------------------------------------------|---------------------------------------------------------------------------------------------------------------------------------------------------------------------------------------------------------------------------------------------------------------------------------------------------------------------------------------------------------------------------------------------------------------------------------------------------------------------------|-------|-------|---|---|---|---|---|---|---|---|---|---|---|---|---|----|---|---|---|---|
| Score                                                                                                                                                                                                                                                                                                                                                                                                                                                                                                                                                                                                                                                                                                                 | Count                                                                                                                                                                                                                                                                                                                                                                                                                                                                     |       |       |   |   |   |   |   |   |   |   |   |   |   |   |   |    |   |   |   |   |
| 1                                                                                                                                                                                                                                                                                                                                                                                                                                                                                                                                                                                                                                                                                                                     | 0                                                                                                                                                                                                                                                                                                                                                                                                                                                                         |       |       |   |   |   |   |   |   |   |   |   |   |   |   |   |    |   |   |   |   |
| 2                                                                                                                                                                                                                                                                                                                                                                                                                                                                                                                                                                                                                                                                                                                     | 0                                                                                                                                                                                                                                                                                                                                                                                                                                                                         |       |       |   |   |   |   |   |   |   |   |   |   |   |   |   |    |   |   |   |   |
| 3                                                                                                                                                                                                                                                                                                                                                                                                                                                                                                                                                                                                                                                                                                                     | 0                                                                                                                                                                                                                                                                                                                                                                                                                                                                         |       |       |   |   |   |   |   |   |   |   |   |   |   |   |   |    |   |   |   |   |
| 4                                                                                                                                                                                                                                                                                                                                                                                                                                                                                                                                                                                                                                                                                                                     | 0                                                                                                                                                                                                                                                                                                                                                                                                                                                                         |       |       |   |   |   |   |   |   |   |   |   |   |   |   |   |    |   |   |   |   |
| 5                                                                                                                                                                                                                                                                                                                                                                                                                                                                                                                                                                                                                                                                                                                     | 1                                                                                                                                                                                                                                                                                                                                                                                                                                                                         |       |       |   |   |   |   |   |   |   |   |   |   |   |   |   |    |   |   |   |   |
| 6                                                                                                                                                                                                                                                                                                                                                                                                                                                                                                                                                                                                                                                                                                                     | 3                                                                                                                                                                                                                                                                                                                                                                                                                                                                         |       |       |   |   |   |   |   |   |   |   |   |   |   |   |   |    |   |   |   |   |
| 7                                                                                                                                                                                                                                                                                                                                                                                                                                                                                                                                                                                                                                                                                                                     | 10                                                                                                                                                                                                                                                                                                                                                                                                                                                                        |       |       |   |   |   |   |   |   |   |   |   |   |   |   |   |    |   |   |   |   |
| 8                                                                                                                                                                                                                                                                                                                                                                                                                                                                                                                                                                                                                                                                                                                     | 8                                                                                                                                                                                                                                                                                                                                                                                                                                                                         |       |       |   |   |   |   |   |   |   |   |   |   |   |   |   |    |   |   |   |   |
| 9                                                                                                                                                                                                                                                                                                                                                                                                                                                                                                                                                                                                                                                                                                                     | 8                                                                                                                                                                                                                                                                                                                                                                                                                                                                         |       |       |   |   |   |   |   |   |   |   |   |   |   |   |   |    |   |   |   |   |
| <p>20. Hemihepatectomy is the appropriate local treatment method for multiple CRLM (<math>\geq 3</math>) within a single lobe when at least one of these CRLM is deep-seated, even when potentially ablatable, at the prerequisite that CCI is <math>\leq 8</math>, ASA is <math>\leq 3</math> and ECOG is <math>\leq 2</math>.</p>                                                                                                                                                                                                                                                                                                                                                                                   |  <table border="1"> <thead> <tr> <th>Score</th> <th>Count</th> </tr> </thead> <tbody> <tr><td>1</td><td>0</td></tr> <tr><td>2</td><td>0</td></tr> <tr><td>3</td><td>0</td></tr> <tr><td>4</td><td>4</td></tr> <tr><td>5</td><td>0</td></tr> <tr><td>6</td><td>5</td></tr> <tr><td>7</td><td>10</td></tr> <tr><td>8</td><td>4</td></tr> <tr><td>9</td><td>7</td></tr> </tbody> </table>  | Score | Count | 1 | 0 | 2 | 0 | 3 | 0 | 4 | 4 | 5 | 0 | 6 | 5 | 7 | 10 | 8 | 4 | 9 | 7 |
| Score                                                                                                                                                                                                                                                                                                                                                                                                                                                                                                                                                                                                                                                                                                                 | Count                                                                                                                                                                                                                                                                                                                                                                                                                                                                     |       |       |   |   |   |   |   |   |   |   |   |   |   |   |   |    |   |   |   |   |
| 1                                                                                                                                                                                                                                                                                                                                                                                                                                                                                                                                                                                                                                                                                                                     | 0                                                                                                                                                                                                                                                                                                                                                                                                                                                                         |       |       |   |   |   |   |   |   |   |   |   |   |   |   |   |    |   |   |   |   |
| 2                                                                                                                                                                                                                                                                                                                                                                                                                                                                                                                                                                                                                                                                                                                     | 0                                                                                                                                                                                                                                                                                                                                                                                                                                                                         |       |       |   |   |   |   |   |   |   |   |   |   |   |   |   |    |   |   |   |   |
| 3                                                                                                                                                                                                                                                                                                                                                                                                                                                                                                                                                                                                                                                                                                                     | 0                                                                                                                                                                                                                                                                                                                                                                                                                                                                         |       |       |   |   |   |   |   |   |   |   |   |   |   |   |   |    |   |   |   |   |
| 4                                                                                                                                                                                                                                                                                                                                                                                                                                                                                                                                                                                                                                                                                                                     | 4                                                                                                                                                                                                                                                                                                                                                                                                                                                                         |       |       |   |   |   |   |   |   |   |   |   |   |   |   |   |    |   |   |   |   |
| 5                                                                                                                                                                                                                                                                                                                                                                                                                                                                                                                                                                                                                                                                                                                     | 0                                                                                                                                                                                                                                                                                                                                                                                                                                                                         |       |       |   |   |   |   |   |   |   |   |   |   |   |   |   |    |   |   |   |   |
| 6                                                                                                                                                                                                                                                                                                                                                                                                                                                                                                                                                                                                                                                                                                                     | 5                                                                                                                                                                                                                                                                                                                                                                                                                                                                         |       |       |   |   |   |   |   |   |   |   |   |   |   |   |   |    |   |   |   |   |
| 7                                                                                                                                                                                                                                                                                                                                                                                                                                                                                                                                                                                                                                                                                                                     | 10                                                                                                                                                                                                                                                                                                                                                                                                                                                                        |       |       |   |   |   |   |   |   |   |   |   |   |   |   |   |    |   |   |   |   |
| 8                                                                                                                                                                                                                                                                                                                                                                                                                                                                                                                                                                                                                                                                                                                     | 4                                                                                                                                                                                                                                                                                                                                                                                                                                                                         |       |       |   |   |   |   |   |   |   |   |   |   |   |   |   |    |   |   |   |   |
| 9                                                                                                                                                                                                                                                                                                                                                                                                                                                                                                                                                                                                                                                                                                                     | 7                                                                                                                                                                                                                                                                                                                                                                                                                                                                         |       |       |   |   |   |   |   |   |   |   |   |   |   |   |   |    |   |   |   |   |
| <p>21. When considering fit patients with multiple scattered and bilobar CRLM <math>\leq 3</math>cm (<math>\geq 6</math> CRLM in total and <math>\geq 3</math> deep-seated CRLM in both lobes separately) what treatment is appropriate: <u>chip-and-burn</u> wedge resection(s) of all exophytic, superficial and shallow CRLM and thermal ablation of all deep-seated CRLM; or a <u>2-stage-hepatectomy</u>: stage 1: wedge resection(s) of all superficial CRLM and thermal ablations of all deep-seated CRLM in 1 lobe and (following contralateral liver augmentation) stage 2: contralateral hemihepatectomy.</p> <p>Score 1-3: chip-and-burn<br/> Score 4-6: equipoise<br/> Score 7-9: 2-stage-hepatectomy</p> |  <table border="1"> <thead> <tr> <th>Score</th> <th>Count</th> </tr> </thead> <tbody> <tr><td>1</td><td>5</td></tr> <tr><td>2</td><td>5</td></tr> <tr><td>3</td><td>3</td></tr> <tr><td>4</td><td>0</td></tr> <tr><td>5</td><td>5</td></tr> <tr><td>6</td><td>0</td></tr> <tr><td>7</td><td>2</td></tr> <tr><td>8</td><td>5</td></tr> <tr><td>9</td><td>2</td></tr> </tbody> </table> | Score | Count | 1 | 5 | 2 | 5 | 3 | 3 | 4 | 0 | 5 | 5 | 6 | 0 | 7 | 2  | 8 | 5 | 9 | 2 |
| Score                                                                                                                                                                                                                                                                                                                                                                                                                                                                                                                                                                                                                                                                                                                 | Count                                                                                                                                                                                                                                                                                                                                                                                                                                                                     |       |       |   |   |   |   |   |   |   |   |   |   |   |   |   |    |   |   |   |   |
| 1                                                                                                                                                                                                                                                                                                                                                                                                                                                                                                                                                                                                                                                                                                                     | 5                                                                                                                                                                                                                                                                                                                                                                                                                                                                         |       |       |   |   |   |   |   |   |   |   |   |   |   |   |   |    |   |   |   |   |
| 2                                                                                                                                                                                                                                                                                                                                                                                                                                                                                                                                                                                                                                                                                                                     | 5                                                                                                                                                                                                                                                                                                                                                                                                                                                                         |       |       |   |   |   |   |   |   |   |   |   |   |   |   |   |    |   |   |   |   |
| 3                                                                                                                                                                                                                                                                                                                                                                                                                                                                                                                                                                                                                                                                                                                     | 3                                                                                                                                                                                                                                                                                                                                                                                                                                                                         |       |       |   |   |   |   |   |   |   |   |   |   |   |   |   |    |   |   |   |   |
| 4                                                                                                                                                                                                                                                                                                                                                                                                                                                                                                                                                                                                                                                                                                                     | 0                                                                                                                                                                                                                                                                                                                                                                                                                                                                         |       |       |   |   |   |   |   |   |   |   |   |   |   |   |   |    |   |   |   |   |
| 5                                                                                                                                                                                                                                                                                                                                                                                                                                                                                                                                                                                                                                                                                                                     | 5                                                                                                                                                                                                                                                                                                                                                                                                                                                                         |       |       |   |   |   |   |   |   |   |   |   |   |   |   |   |    |   |   |   |   |
| 6                                                                                                                                                                                                                                                                                                                                                                                                                                                                                                                                                                                                                                                                                                                     | 0                                                                                                                                                                                                                                                                                                                                                                                                                                                                         |       |       |   |   |   |   |   |   |   |   |   |   |   |   |   |    |   |   |   |   |
| 7                                                                                                                                                                                                                                                                                                                                                                                                                                                                                                                                                                                                                                                                                                                     | 2                                                                                                                                                                                                                                                                                                                                                                                                                                                                         |       |       |   |   |   |   |   |   |   |   |   |   |   |   |   |    |   |   |   |   |
| 8                                                                                                                                                                                                                                                                                                                                                                                                                                                                                                                                                                                                                                                                                                                     | 5                                                                                                                                                                                                                                                                                                                                                                                                                                                                         |       |       |   |   |   |   |   |   |   |   |   |   |   |   |   |    |   |   |   |   |
| 9                                                                                                                                                                                                                                                                                                                                                                                                                                                                                                                                                                                                                                                                                                                     | 2                                                                                                                                                                                                                                                                                                                                                                                                                                                                         |       |       |   |   |   |   |   |   |   |   |   |   |   |   |   |    |   |   |   |   |

| <p>22. Anatomical contra-indications for partial hepatectomy are: (a) inability to obtain R0 margins, (b) inability to leave a sufficient FLR volume and/or function, (c) inability to preserve the dual blood supply and the venous and biliary drainage from the FLR and (d) inaccessibility of the abdominal cavity due to excessive abdominal adhesions.</p>                                                                                                                                                                                                                                                      | 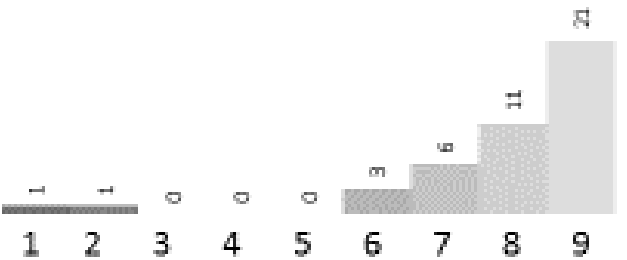 <table border="1"> <thead> <tr> <th>Category</th> <th>Frequency</th> </tr> </thead> <tbody> <tr><td>1</td><td>1</td></tr> <tr><td>2</td><td>1</td></tr> <tr><td>3</td><td>0</td></tr> <tr><td>4</td><td>0</td></tr> <tr><td>5</td><td>0</td></tr> <tr><td>6</td><td>3</td></tr> <tr><td>7</td><td>5</td></tr> <tr><td>8</td><td>11</td></tr> <tr><td>9</td><td>21</td></tr> </tbody> </table>   | Category | Frequency | 1 | 1 | 2 | 1 | 3 | 0 | 4 | 0 | 5 | 0 | 6 | 3 | 7 | 5  | 8 | 11 | 9 | 21 |
|-----------------------------------------------------------------------------------------------------------------------------------------------------------------------------------------------------------------------------------------------------------------------------------------------------------------------------------------------------------------------------------------------------------------------------------------------------------------------------------------------------------------------------------------------------------------------------------------------------------------------|------------------------------------------------------------------------------------------------------------------------------------------------------------------------------------------------------------------------------------------------------------------------------------------------------------------------------------------------------------------------------------------------------------------------------------------------------------------------------------|----------|-----------|---|---|---|---|---|---|---|---|---|---|---|---|---|----|---|----|---|----|
| Category                                                                                                                                                                                                                                                                                                                                                                                                                                                                                                                                                                                                              | Frequency                                                                                                                                                                                                                                                                                                                                                                                                                                                                          |          |           |   |   |   |   |   |   |   |   |   |   |   |   |   |    |   |    |   |    |
| 1                                                                                                                                                                                                                                                                                                                                                                                                                                                                                                                                                                                                                     | 1                                                                                                                                                                                                                                                                                                                                                                                                                                                                                  |          |           |   |   |   |   |   |   |   |   |   |   |   |   |   |    |   |    |   |    |
| 2                                                                                                                                                                                                                                                                                                                                                                                                                                                                                                                                                                                                                     | 1                                                                                                                                                                                                                                                                                                                                                                                                                                                                                  |          |           |   |   |   |   |   |   |   |   |   |   |   |   |   |    |   |    |   |    |
| 3                                                                                                                                                                                                                                                                                                                                                                                                                                                                                                                                                                                                                     | 0                                                                                                                                                                                                                                                                                                                                                                                                                                                                                  |          |           |   |   |   |   |   |   |   |   |   |   |   |   |   |    |   |    |   |    |
| 4                                                                                                                                                                                                                                                                                                                                                                                                                                                                                                                                                                                                                     | 0                                                                                                                                                                                                                                                                                                                                                                                                                                                                                  |          |           |   |   |   |   |   |   |   |   |   |   |   |   |   |    |   |    |   |    |
| 5                                                                                                                                                                                                                                                                                                                                                                                                                                                                                                                                                                                                                     | 0                                                                                                                                                                                                                                                                                                                                                                                                                                                                                  |          |           |   |   |   |   |   |   |   |   |   |   |   |   |   |    |   |    |   |    |
| 6                                                                                                                                                                                                                                                                                                                                                                                                                                                                                                                                                                                                                     | 3                                                                                                                                                                                                                                                                                                                                                                                                                                                                                  |          |           |   |   |   |   |   |   |   |   |   |   |   |   |   |    |   |    |   |    |
| 7                                                                                                                                                                                                                                                                                                                                                                                                                                                                                                                                                                                                                     | 5                                                                                                                                                                                                                                                                                                                                                                                                                                                                                  |          |           |   |   |   |   |   |   |   |   |   |   |   |   |   |    |   |    |   |    |
| 8                                                                                                                                                                                                                                                                                                                                                                                                                                                                                                                                                                                                                     | 11                                                                                                                                                                                                                                                                                                                                                                                                                                                                                 |          |           |   |   |   |   |   |   |   |   |   |   |   |   |   |    |   |    |   |    |
| 9                                                                                                                                                                                                                                                                                                                                                                                                                                                                                                                                                                                                                     | 21                                                                                                                                                                                                                                                                                                                                                                                                                                                                                 |          |           |   |   |   |   |   |   |   |   |   |   |   |   |   |    |   |    |   |    |
| <p>23. Anatomical contra-indications for thermal ablation are: (a) peri-tumoral vicinity (&lt;10mm) of the common, left or right hepatic bile duct or (b) peri-hepatic critical structures that cannot be distanced using surgical or interventional dissection methods, (c) the abutment or encasement of the single remaining major portal or systemic vein following surgery and (d) an invasion of the free wall of the inferior caval vein. The maximum size is 3cm, although thermal ablation can be considered for 3-5cm unresectable CRLM after failure to (further) downsize them with systemic therapy.</p> |  <table border="1"> <thead> <tr> <th>Category</th> <th>Frequency</th> </tr> </thead> <tbody> <tr><td>1</td><td>0</td></tr> <tr><td>2</td><td>1</td></tr> <tr><td>3</td><td>2</td></tr> <tr><td>4</td><td>4</td></tr> <tr><td>5</td><td>0</td></tr> <tr><td>6</td><td>2</td></tr> <tr><td>7</td><td>10</td></tr> <tr><td>8</td><td>16</td></tr> <tr><td>9</td><td>9</td></tr> </tbody> </table>   | Category | Frequency | 1 | 0 | 2 | 1 | 3 | 2 | 4 | 4 | 5 | 0 | 6 | 2 | 7 | 10 | 8 | 16 | 9 | 9  |
| Category                                                                                                                                                                                                                                                                                                                                                                                                                                                                                                                                                                                                              | Frequency                                                                                                                                                                                                                                                                                                                                                                                                                                                                          |          |           |   |   |   |   |   |   |   |   |   |   |   |   |   |    |   |    |   |    |
| 1                                                                                                                                                                                                                                                                                                                                                                                                                                                                                                                                                                                                                     | 0                                                                                                                                                                                                                                                                                                                                                                                                                                                                                  |          |           |   |   |   |   |   |   |   |   |   |   |   |   |   |    |   |    |   |    |
| 2                                                                                                                                                                                                                                                                                                                                                                                                                                                                                                                                                                                                                     | 1                                                                                                                                                                                                                                                                                                                                                                                                                                                                                  |          |           |   |   |   |   |   |   |   |   |   |   |   |   |   |    |   |    |   |    |
| 3                                                                                                                                                                                                                                                                                                                                                                                                                                                                                                                                                                                                                     | 2                                                                                                                                                                                                                                                                                                                                                                                                                                                                                  |          |           |   |   |   |   |   |   |   |   |   |   |   |   |   |    |   |    |   |    |
| 4                                                                                                                                                                                                                                                                                                                                                                                                                                                                                                                                                                                                                     | 4                                                                                                                                                                                                                                                                                                                                                                                                                                                                                  |          |           |   |   |   |   |   |   |   |   |   |   |   |   |   |    |   |    |   |    |
| 5                                                                                                                                                                                                                                                                                                                                                                                                                                                                                                                                                                                                                     | 0                                                                                                                                                                                                                                                                                                                                                                                                                                                                                  |          |           |   |   |   |   |   |   |   |   |   |   |   |   |   |    |   |    |   |    |
| 6                                                                                                                                                                                                                                                                                                                                                                                                                                                                                                                                                                                                                     | 2                                                                                                                                                                                                                                                                                                                                                                                                                                                                                  |          |           |   |   |   |   |   |   |   |   |   |   |   |   |   |    |   |    |   |    |
| 7                                                                                                                                                                                                                                                                                                                                                                                                                                                                                                                                                                                                                     | 10                                                                                                                                                                                                                                                                                                                                                                                                                                                                                 |          |           |   |   |   |   |   |   |   |   |   |   |   |   |   |    |   |    |   |    |
| 8                                                                                                                                                                                                                                                                                                                                                                                                                                                                                                                                                                                                                     | 16                                                                                                                                                                                                                                                                                                                                                                                                                                                                                 |          |           |   |   |   |   |   |   |   |   |   |   |   |   |   |    |   |    |   |    |
| 9                                                                                                                                                                                                                                                                                                                                                                                                                                                                                                                                                                                                                     | 9                                                                                                                                                                                                                                                                                                                                                                                                                                                                                  |          |           |   |   |   |   |   |   |   |   |   |   |   |   |   |    |   |    |   |    |
| <p>24. Contra-indications for irreversible electroporation are: CRLM &gt;5cm, ventricular arrhythmias, cardiac stimulation devices and congestive heart failure.</p>                                                                                                                                                                                                                                                                                                                                                                                                                                                  |  <table border="1"> <thead> <tr> <th>Category</th> <th>Frequency</th> </tr> </thead> <tbody> <tr><td>1</td><td>0</td></tr> <tr><td>2</td><td>0</td></tr> <tr><td>3</td><td>0</td></tr> <tr><td>4</td><td>0</td></tr> <tr><td>5</td><td>4</td></tr> <tr><td>6</td><td>3</td></tr> <tr><td>7</td><td>7</td></tr> <tr><td>8</td><td>14</td></tr> <tr><td>9</td><td>16</td></tr> </tbody> </table> | Category | Frequency | 1 | 0 | 2 | 0 | 3 | 0 | 4 | 0 | 5 | 4 | 6 | 3 | 7 | 7  | 8 | 14 | 9 | 16 |
| Category                                                                                                                                                                                                                                                                                                                                                                                                                                                                                                                                                                                                              | Frequency                                                                                                                                                                                                                                                                                                                                                                                                                                                                          |          |           |   |   |   |   |   |   |   |   |   |   |   |   |   |    |   |    |   |    |
| 1                                                                                                                                                                                                                                                                                                                                                                                                                                                                                                                                                                                                                     | 0                                                                                                                                                                                                                                                                                                                                                                                                                                                                                  |          |           |   |   |   |   |   |   |   |   |   |   |   |   |   |    |   |    |   |    |
| 2                                                                                                                                                                                                                                                                                                                                                                                                                                                                                                                                                                                                                     | 0                                                                                                                                                                                                                                                                                                                                                                                                                                                                                  |          |           |   |   |   |   |   |   |   |   |   |   |   |   |   |    |   |    |   |    |
| 3                                                                                                                                                                                                                                                                                                                                                                                                                                                                                                                                                                                                                     | 0                                                                                                                                                                                                                                                                                                                                                                                                                                                                                  |          |           |   |   |   |   |   |   |   |   |   |   |   |   |   |    |   |    |   |    |
| 4                                                                                                                                                                                                                                                                                                                                                                                                                                                                                                                                                                                                                     | 0                                                                                                                                                                                                                                                                                                                                                                                                                                                                                  |          |           |   |   |   |   |   |   |   |   |   |   |   |   |   |    |   |    |   |    |
| 5                                                                                                                                                                                                                                                                                                                                                                                                                                                                                                                                                                                                                     | 4                                                                                                                                                                                                                                                                                                                                                                                                                                                                                  |          |           |   |   |   |   |   |   |   |   |   |   |   |   |   |    |   |    |   |    |
| 6                                                                                                                                                                                                                                                                                                                                                                                                                                                                                                                                                                                                                     | 3                                                                                                                                                                                                                                                                                                                                                                                                                                                                                  |          |           |   |   |   |   |   |   |   |   |   |   |   |   |   |    |   |    |   |    |
| 7                                                                                                                                                                                                                                                                                                                                                                                                                                                                                                                                                                                                                     | 7                                                                                                                                                                                                                                                                                                                                                                                                                                                                                  |          |           |   |   |   |   |   |   |   |   |   |   |   |   |   |    |   |    |   |    |
| 8                                                                                                                                                                                                                                                                                                                                                                                                                                                                                                                                                                                                                     | 14                                                                                                                                                                                                                                                                                                                                                                                                                                                                                 |          |           |   |   |   |   |   |   |   |   |   |   |   |   |   |    |   |    |   |    |
| 9                                                                                                                                                                                                                                                                                                                                                                                                                                                                                                                                                                                                                     | 16                                                                                                                                                                                                                                                                                                                                                                                                                                                                                 |          |           |   |   |   |   |   |   |   |   |   |   |   |   |   |    |   |    |   |    |
| <p>25. Contra-indications for stereotactic body radiotherapy (SBRT) are: &gt;3 CRLM and inability to deliver an ablative dose without jeopardizing liver function and adjacent organs or structures at risk.</p>                                                                                                                                                                                                                                                                                                                                                                                                      |  <table border="1"> <thead> <tr> <th>Category</th> <th>Frequency</th> </tr> </thead> <tbody> <tr><td>1</td><td>2</td></tr> <tr><td>2</td><td>0</td></tr> <tr><td>3</td><td>0</td></tr> <tr><td>4</td><td>0</td></tr> <tr><td>5</td><td>2</td></tr> <tr><td>6</td><td>3</td></tr> <tr><td>7</td><td>11</td></tr> <tr><td>8</td><td>8</td></tr> <tr><td>9</td><td>7</td></tr> </tbody> </table>  | Category | Frequency | 1 | 2 | 2 | 0 | 3 | 0 | 4 | 0 | 5 | 2 | 6 | 3 | 7 | 11 | 8 | 8  | 9 | 7  |
| Category                                                                                                                                                                                                                                                                                                                                                                                                                                                                                                                                                                                                              | Frequency                                                                                                                                                                                                                                                                                                                                                                                                                                                                          |          |           |   |   |   |   |   |   |   |   |   |   |   |   |   |    |   |    |   |    |
| 1                                                                                                                                                                                                                                                                                                                                                                                                                                                                                                                                                                                                                     | 2                                                                                                                                                                                                                                                                                                                                                                                                                                                                                  |          |           |   |   |   |   |   |   |   |   |   |   |   |   |   |    |   |    |   |    |
| 2                                                                                                                                                                                                                                                                                                                                                                                                                                                                                                                                                                                                                     | 0                                                                                                                                                                                                                                                                                                                                                                                                                                                                                  |          |           |   |   |   |   |   |   |   |   |   |   |   |   |   |    |   |    |   |    |
| 3                                                                                                                                                                                                                                                                                                                                                                                                                                                                                                                                                                                                                     | 0                                                                                                                                                                                                                                                                                                                                                                                                                                                                                  |          |           |   |   |   |   |   |   |   |   |   |   |   |   |   |    |   |    |   |    |
| 4                                                                                                                                                                                                                                                                                                                                                                                                                                                                                                                                                                                                                     | 0                                                                                                                                                                                                                                                                                                                                                                                                                                                                                  |          |           |   |   |   |   |   |   |   |   |   |   |   |   |   |    |   |    |   |    |
| 5                                                                                                                                                                                                                                                                                                                                                                                                                                                                                                                                                                                                                     | 2                                                                                                                                                                                                                                                                                                                                                                                                                                                                                  |          |           |   |   |   |   |   |   |   |   |   |   |   |   |   |    |   |    |   |    |
| 6                                                                                                                                                                                                                                                                                                                                                                                                                                                                                                                                                                                                                     | 3                                                                                                                                                                                                                                                                                                                                                                                                                                                                                  |          |           |   |   |   |   |   |   |   |   |   |   |   |   |   |    |   |    |   |    |
| 7                                                                                                                                                                                                                                                                                                                                                                                                                                                                                                                                                                                                                     | 11                                                                                                                                                                                                                                                                                                                                                                                                                                                                                 |          |           |   |   |   |   |   |   |   |   |   |   |   |   |   |    |   |    |   |    |
| 8                                                                                                                                                                                                                                                                                                                                                                                                                                                                                                                                                                                                                     | 8                                                                                                                                                                                                                                                                                                                                                                                                                                                                                  |          |           |   |   |   |   |   |   |   |   |   |   |   |   |   |    |   |    |   |    |
| 9                                                                                                                                                                                                                                                                                                                                                                                                                                                                                                                                                                                                                     | 7                                                                                                                                                                                                                                                                                                                                                                                                                                                                                  |          |           |   |   |   |   |   |   |   |   |   |   |   |   |   |    |   |    |   |    |
